# Supplementary material for: Barley ABI5 (Abscisic Acid INSENSITIVE 5) Is Involved in Abscisic Acid-Dependent Drought Response
Source: Front Plant Sci. 2020 Jul 29;11:1138. doi: 10.3389/fpls.2020.01138 (PMC7405899; doi:10.3389/fpls.2020.01138)
Supplement: Supplementary file 9 [file DataSheet_9.xlsx]

## Sheet: Supplementary Material
Supplementary Material S9
Gene Ontology categories (Biological Processes) over-represented in hvabi5.d-specific subsets of genes, up- or down-regulated in comparison to 'Sebastian' under control conditions (corrected P<0.01).

## Sheet: 10 DAS_Seb_hvabi5d_U_GO
GO categories (Biological Processes) that were over-represented in the hvabi5.d mutant compared to 'Sebastian' under control conditions among up-regulated -genes.
GO term	Ontology	Description	Number in input list	Number in BG/Ref	p-value	FDR
GO:1901566	P	organonitrogen compound biosynthetic process	42	1231	4.6e-10	4.4e-08
GO:0006412	P	translation	34	849	5.3e-10	5.1e-08
GO:0043043	P	peptide biosynthetic process	34	856	6.5e-10	6.3e-08
GO:0043604	P	amide biosynthetic process	34	856	6.5e-10	6.3e-08
GO:0006518	P	peptide metabolic process	34	869	9.5e-10	9.1e-08
GO:0043603	P	cellular amide metabolic process	34	878	1.2e-09	1.2e-07
GO:1901564	P	organonitrogen compound metabolic process	45	1564	1.7e-08	1.6e-06
GO:0006457	P	protein folding	12	146	2.8e-07	2.7e-05
GO:0044249	P	cellular biosynthetic process	59	2926	1.2e-05	0.0012
GO:1901576	P	organic substance biosynthetic process	57	2929	5e-05	0.0048
GO:0034645	P	cellular macromolecule biosynthetic process	47	2248	5e-05	0.0048
GO:0009059	P	macromolecule biosynthetic process	47	2248	5e-05	0.0048
GO:0009058	P	biosynthetic process	59	3072	5.1e-05	0.0049
GO:0009987	P	cellular process	114	7318	6.9e-05	0.0066

## Sheet: 10 DAS_Seb_hvabi5d_U_genelist
GO categories (Biological Processes) that were over-represented in the hvabi5.d mutant compared to 'Sebastian' under control conditions among up-regulated -genes. List of genes.
GO term	Description	Gene ID	FC (abs)	Description IPK
GO:1901566	organonitrogen compound biosynthetic process	HORVU2Hr1G102610	2.00014	60S ribosomal protein L12
GO:1901566	organonitrogen compound biosynthetic process	HORVU7Hr1G052960	2.13654	60S ribosomal protein L32-1
GO:1901566	organonitrogen compound biosynthetic process	HORVU4Hr1G037800	3.9401	40S ribosomal protein S29
GO:1901566	organonitrogen compound biosynthetic process	HORVU2Hr1G099230	2.21685	40S ribosomal protein S11
GO:1901566	organonitrogen compound biosynthetic process	HORVU6Hr1G041750	3.1927	60S ribosomal protein L6
GO:1901566	organonitrogen compound biosynthetic process	HORVU5Hr1G048830	2.76601	60S ribosomal protein L15-1
GO:1901566	organonitrogen compound biosynthetic process	HORVU4Hr1G084420	2.27548	60S ribosomal protein L21-2
GO:1901566	organonitrogen compound biosynthetic process	HORVU6Hr1G058750	2.31685	adenosine kinase 1
GO:1901566	organonitrogen compound biosynthetic process	HORVU2Hr1G089070	2.03537	60S ribosomal protein L14-1
GO:1901566	organonitrogen compound biosynthetic process	HORVU3Hr1G086050	2.18427	30S ribosomal protein S5
GO:1901566	organonitrogen compound biosynthetic process	HORVU2Hr1G029350	2.84422	adenylate kinase family protein
GO:1901566	organonitrogen compound biosynthetic process	HORVU2Hr1G089090	2.03537	60S ribosomal protein L14-1
GO:1901566	organonitrogen compound biosynthetic process	HORVU5Hr1G043190	2.19088	2-isopropylmalate synthase 1
GO:1901566	organonitrogen compound biosynthetic process	HORVU3Hr1G001140	2.21021	Ribosomal protein L6 family
GO:1901566	organonitrogen compound biosynthetic process	HORVU7Hr1G063280	2.07901	60S ribosomal protein L27-3
GO:1901566	organonitrogen compound biosynthetic process	HORVU3Hr1G085760	4.52322	Gamma-glutamyl phosphate reductase
GO:1901566	organonitrogen compound biosynthetic process	HORVU7Hr1G052800	3.7658	60S ribosomal protein L32-1
GO:1901566	organonitrogen compound biosynthetic process	HORVU2Hr1G113180	6.31613	D-3-phosphoglycerate dehydrogenase
GO:1901566	organonitrogen compound biosynthetic process	HORVU3Hr1G113940	2.04495	eukaryotic translation initiation factor 4E
GO:1901566	organonitrogen compound biosynthetic process	HORVU3Hr1G104200	3.43257	Eukaryotic peptide chain release factor subunit 1-2
GO:1901566	organonitrogen compound biosynthetic process	HORVU2Hr1G080340	2.37935	60S ribosomal protein L34
GO:1901566	organonitrogen compound biosynthetic process	HORVU2Hr1G029890	2.03594	40S ribosomal protein S6
GO:1901566	organonitrogen compound biosynthetic process	HORVU7Hr1G088580	2.28053	40S ribosomal protein S24-2
GO:1901566	organonitrogen compound biosynthetic process	HORVU1Hr1G072780	4.25991	Gamma-glutamyl phosphate reductase
GO:1901566	organonitrogen compound biosynthetic process	HORVU5Hr1G104720	2.68682	30S ribosomal protein S13
GO:1901566	organonitrogen compound biosynthetic process	HORVU6Hr1G044840	2.42076	40S ribosomal protein S24-2
GO:1901566	organonitrogen compound biosynthetic process	HORVU3Hr1G015190	2.44885	30S ribosomal protein S7
GO:1901566	organonitrogen compound biosynthetic process	HORVU5Hr1G052280	2.22485	60S ribosomal protein L17-1
GO:1901566	organonitrogen compound biosynthetic process	HORVU5Hr1G092630	2.34034	60S ribosomal protein L5-1
GO:1901566	organonitrogen compound biosynthetic process	HORVU4Hr1G070370	2.11556	40S ribosomal protein S3a
GO:1901566	organonitrogen compound biosynthetic process	HORVU7Hr1G050170	2.14843	60S ribosomal protein L31
GO:1901566	organonitrogen compound biosynthetic process	HORVU4Hr1G019980	2.28527	ribosomal protein 1
GO:1901566	organonitrogen compound biosynthetic process	HORVU4Hr1G074270	2.41124	40S ribosomal protein S27
GO:1901566	organonitrogen compound biosynthetic process	HORVU3Hr1G013910	3.09625	Asparagine synthetase [glutamine-hydrolyzing]
GO:1901566	organonitrogen compound biosynthetic process	HORVU1Hr1G021700	2.14495	Histidine--tRNA ligase
GO:1901566	organonitrogen compound biosynthetic process	HORVU7Hr1G080630	2.15076	60S ribosomal protein L22-2
GO:1901566	organonitrogen compound biosynthetic process	HORVU7Hr1G014140	2.11452	40S ribosomal protein S20
GO:1901566	organonitrogen compound biosynthetic process	HORVU3Hr1G051530	2.08378	50S ribosomal protein L25
GO:1901566	organonitrogen compound biosynthetic process	HORVU6Hr1G058560	2.51905	60S ribosomal protein L14-1
GO:1901566	organonitrogen compound biosynthetic process	HORVU4Hr1G055230	2.07073	40S ribosomal protein S7
GO:1901566	organonitrogen compound biosynthetic process	HORVU6Hr1G070670	2.07713	60S ribosomal protein L31
GO:1901566	organonitrogen compound biosynthetic process	HORVU4Hr1G044040	2.39651	Nucleoside diphosphate kinase family protein
GO:0006412	translation	HORVU2Hr1G102610	2.00014	60S ribosomal protein L12
GO:0006412	translation	HORVU7Hr1G052960	2.13654	60S ribosomal protein L32-1
GO:0006412	translation	HORVU6Hr1G041750	3.1927	60S ribosomal protein L6
GO:0006412	translation	HORVU5Hr1G048830	2.76601	60S ribosomal protein L15-1
GO:0006412	translation	HORVU4Hr1G084420	2.27548	60S ribosomal protein L21-2
GO:0006412	translation	HORVU2Hr1G089070	2.03537	60S ribosomal protein L14-1
GO:0006412	translation	HORVU3Hr1G086050	2.18427	30S ribosomal protein S5
GO:0006412	translation	HORVU2Hr1G099230	2.21685	40S ribosomal protein S11
GO:0006412	translation	HORVU2Hr1G089090	2.03537	60S ribosomal protein L14-1
GO:0006412	translation	HORVU4Hr1G037800	3.9401	40S ribosomal protein S29
GO:0006412	translation	HORVU3Hr1G001140	2.21021	Ribosomal protein L6 family
GO:0006412	translation	HORVU7Hr1G063280	2.07901	60S ribosomal protein L27-3
GO:0006412	translation	HORVU7Hr1G052800	3.7658	60S ribosomal protein L32-1
GO:0006412	translation	HORVU3Hr1G113940	2.04495	eukaryotic translation initiation factor 4E
GO:0006412	translation	HORVU3Hr1G104200	3.43257	Eukaryotic peptide chain release factor subunit 1-2
GO:0006412	translation	HORVU2Hr1G080340	2.37935	60S ribosomal protein L34
GO:0006412	translation	HORVU2Hr1G029890	2.03594	40S ribosomal protein S6
GO:0006412	translation	HORVU7Hr1G088580	2.28053	40S ribosomal protein S24-2
GO:0006412	translation	HORVU5Hr1G104720	2.68682	30S ribosomal protein S13
GO:0006412	translation	HORVU6Hr1G044840	2.42076	40S ribosomal protein S24-2
GO:0006412	translation	HORVU3Hr1G015190	2.44885	30S ribosomal protein S7
GO:0006412	translation	HORVU5Hr1G052280	2.22485	60S ribosomal protein L17-1
GO:0006412	translation	HORVU5Hr1G092630	2.34034	60S ribosomal protein L5-1
GO:0006412	translation	HORVU4Hr1G070370	2.11556	40S ribosomal protein S3a
GO:0006412	translation	HORVU7Hr1G050170	2.14843	60S ribosomal protein L31
GO:0006412	translation	HORVU4Hr1G019980	2.28527	ribosomal protein 1
GO:0006412	translation	HORVU4Hr1G074270	2.41124	40S ribosomal protein S27
GO:0006412	translation	HORVU1Hr1G021700	2.14495	Histidine--tRNA ligase
GO:0006412	translation	HORVU7Hr1G080630	2.15076	60S ribosomal protein L22-2
GO:0006412	translation	HORVU7Hr1G014140	2.11452	40S ribosomal protein S20
GO:0006412	translation	HORVU3Hr1G051530	2.08378	50S ribosomal protein L25
GO:0006412	translation	HORVU6Hr1G058560	2.51905	60S ribosomal protein L14-1
GO:0006412	translation	HORVU4Hr1G055230	2.07073	40S ribosomal protein S7
GO:0006412	translation	HORVU6Hr1G070670	2.07713	60S ribosomal protein L31
GO:0043043	peptide biosynthetic process	HORVU2Hr1G102610	2.00014	60S ribosomal protein L12
GO:0043043	peptide biosynthetic process	HORVU7Hr1G052960	2.13654	60S ribosomal protein L32-1
GO:0043043	peptide biosynthetic process	HORVU6Hr1G041750	3.1927	60S ribosomal protein L6
GO:0043043	peptide biosynthetic process	HORVU5Hr1G048830	2.76601	60S ribosomal protein L15-1
GO:0043043	peptide biosynthetic process	HORVU4Hr1G084420	2.27548	60S ribosomal protein L21-2
GO:0043043	peptide biosynthetic process	HORVU2Hr1G089070	2.03537	60S ribosomal protein L14-1
GO:0043043	peptide biosynthetic process	HORVU3Hr1G086050	2.18427	30S ribosomal protein S5
GO:0043043	peptide biosynthetic process	HORVU2Hr1G099230	2.21685	40S ribosomal protein S11
GO:0043043	peptide biosynthetic process	HORVU2Hr1G089090	2.03537	60S ribosomal protein L14-1
GO:0043043	peptide biosynthetic process	HORVU4Hr1G037800	3.9401	40S ribosomal protein S29
GO:0043043	peptide biosynthetic process	HORVU3Hr1G001140	2.21021	Ribosomal protein L6 family
GO:0043043	peptide biosynthetic process	HORVU7Hr1G063280	2.07901	60S ribosomal protein L27-3
GO:0043043	peptide biosynthetic process	HORVU7Hr1G052800	3.7658	60S ribosomal protein L32-1
GO:0043043	peptide biosynthetic process	HORVU3Hr1G113940	2.04495	eukaryotic translation initiation factor 4E
GO:0043043	peptide biosynthetic process	HORVU3Hr1G104200	3.43257	Eukaryotic peptide chain release factor subunit 1-2
GO:0043043	peptide biosynthetic process	HORVU2Hr1G080340	2.37935	60S ribosomal protein L34
GO:0043043	peptide biosynthetic process	HORVU2Hr1G029890	2.03594	40S ribosomal protein S6
GO:0043043	peptide biosynthetic process	HORVU7Hr1G088580	2.28053	40S ribosomal protein S24-2
GO:0043043	peptide biosynthetic process	HORVU5Hr1G104720	2.68682	30S ribosomal protein S13
GO:0043043	peptide biosynthetic process	HORVU6Hr1G044840	2.42076	40S ribosomal protein S24-2
GO:0043043	peptide biosynthetic process	HORVU3Hr1G015190	2.44885	30S ribosomal protein S7
GO:0043043	peptide biosynthetic process	HORVU5Hr1G052280	2.22485	60S ribosomal protein L17-1
GO:0043043	peptide biosynthetic process	HORVU5Hr1G092630	2.34034	60S ribosomal protein L5-1
GO:0043043	peptide biosynthetic process	HORVU4Hr1G070370	2.11556	40S ribosomal protein S3a
GO:0043043	peptide biosynthetic process	HORVU7Hr1G050170	2.14843	60S ribosomal protein L31
GO:0043043	peptide biosynthetic process	HORVU4Hr1G019980	2.28527	ribosomal protein 1
GO:0043043	peptide biosynthetic process	HORVU4Hr1G074270	2.41124	40S ribosomal protein S27
GO:0043043	peptide biosynthetic process	HORVU1Hr1G021700	2.14495	Histidine--tRNA ligase
GO:0043043	peptide biosynthetic process	HORVU7Hr1G080630	2.15076	60S ribosomal protein L22-2
GO:0043043	peptide biosynthetic process	HORVU7Hr1G014140	2.11452	40S ribosomal protein S20
GO:0043043	peptide biosynthetic process	HORVU3Hr1G051530	2.08378	50S ribosomal protein L25
GO:0043043	peptide biosynthetic process	HORVU6Hr1G058560	2.51905	60S ribosomal protein L14-1
GO:0043043	peptide biosynthetic process	HORVU4Hr1G055230	2.07073	40S ribosomal protein S7
GO:0043043	peptide biosynthetic process	HORVU6Hr1G070670	2.07713	60S ribosomal protein L31
GO:0043604	amide biosynthetic process	HORVU2Hr1G102610	2.00014	60S ribosomal protein L12
GO:0043604	amide biosynthetic process	HORVU7Hr1G052960	2.13654	60S ribosomal protein L32-1
GO:0043604	amide biosynthetic process	HORVU6Hr1G041750	3.1927	60S ribosomal protein L6
GO:0043604	amide biosynthetic process	HORVU5Hr1G048830	2.76601	60S ribosomal protein L15-1
GO:0043604	amide biosynthetic process	HORVU4Hr1G084420	2.27548	60S ribosomal protein L21-2
GO:0043604	amide biosynthetic process	HORVU2Hr1G089070	2.03537	60S ribosomal protein L14-1
GO:0043604	amide biosynthetic process	HORVU3Hr1G086050	2.18427	30S ribosomal protein S5
GO:0043604	amide biosynthetic process	HORVU2Hr1G099230	2.21685	40S ribosomal protein S11
GO:0043604	amide biosynthetic process	HORVU2Hr1G089090	2.03537	60S ribosomal protein L14-1
GO:0043604	amide biosynthetic process	HORVU4Hr1G037800	3.9401	40S ribosomal protein S29
GO:0043604	amide biosynthetic process	HORVU3Hr1G001140	2.21021	Ribosomal protein L6 family
GO:0043604	amide biosynthetic process	HORVU7Hr1G063280	2.07901	60S ribosomal protein L27-3
GO:0043604	amide biosynthetic process	HORVU7Hr1G052800	3.7658	60S ribosomal protein L32-1
GO:0043604	amide biosynthetic process	HORVU3Hr1G113940	2.04495	eukaryotic translation initiation factor 4E
GO:0043604	amide biosynthetic process	HORVU3Hr1G104200	3.43257	Eukaryotic peptide chain release factor subunit 1-2
GO:0043604	amide biosynthetic process	HORVU2Hr1G080340	2.37935	60S ribosomal protein L34
GO:0043604	amide biosynthetic process	HORVU2Hr1G029890	2.03594	40S ribosomal protein S6
GO:0043604	amide biosynthetic process	HORVU7Hr1G088580	2.28053	40S ribosomal protein S24-2
GO:0043604	amide biosynthetic process	HORVU5Hr1G104720	2.68682	30S ribosomal protein S13
GO:0043604	amide biosynthetic process	HORVU6Hr1G044840	2.42076	40S ribosomal protein S24-2
GO:0043604	amide biosynthetic process	HORVU3Hr1G015190	2.44885	30S ribosomal protein S7
GO:0043604	amide biosynthetic process	HORVU5Hr1G052280	2.22485	60S ribosomal protein L17-1
GO:0043604	amide biosynthetic process	HORVU5Hr1G092630	2.34034	60S ribosomal protein L5-1
GO:0043604	amide biosynthetic process	HORVU4Hr1G070370	2.11556	40S ribosomal protein S3a
GO:0043604	amide biosynthetic process	HORVU7Hr1G050170	2.14843	60S ribosomal protein L31
GO:0043604	amide biosynthetic process	HORVU4Hr1G019980	2.28527	ribosomal protein 1
GO:0043604	amide biosynthetic process	HORVU4Hr1G074270	2.41124	40S ribosomal protein S27
GO:0043604	amide biosynthetic process	HORVU1Hr1G021700	2.14495	Histidine--tRNA ligase
GO:0043604	amide biosynthetic process	HORVU7Hr1G080630	2.15076	60S ribosomal protein L22-2
GO:0043604	amide biosynthetic process	HORVU7Hr1G014140	2.11452	40S ribosomal protein S20
GO:0043604	amide biosynthetic process	HORVU3Hr1G051530	2.08378	50S ribosomal protein L25
GO:0043604	amide biosynthetic process	HORVU6Hr1G058560	2.51905	60S ribosomal protein L14-1
GO:0043604	amide biosynthetic process	HORVU4Hr1G055230	2.07073	40S ribosomal protein S7
GO:0043604	amide biosynthetic process	HORVU6Hr1G070670	2.07713	60S ribosomal protein L31
GO:0006518	peptide metabolic process	HORVU2Hr1G102610	2.00014	60S ribosomal protein L12
GO:0006518	peptide metabolic process	HORVU7Hr1G052960	2.13654	60S ribosomal protein L32-1
GO:0006518	peptide metabolic process	HORVU6Hr1G041750	3.1927	60S ribosomal protein L6
GO:0006518	peptide metabolic process	HORVU5Hr1G048830	2.76601	60S ribosomal protein L15-1
GO:0006518	peptide metabolic process	HORVU4Hr1G084420	2.27548	60S ribosomal protein L21-2
GO:0006518	peptide metabolic process	HORVU2Hr1G089070	2.03537	60S ribosomal protein L14-1
GO:0006518	peptide metabolic process	HORVU3Hr1G086050	2.18427	30S ribosomal protein S5
GO:0006518	peptide metabolic process	HORVU2Hr1G099230	2.21685	40S ribosomal protein S11
GO:0006518	peptide metabolic process	HORVU2Hr1G089090	2.03537	60S ribosomal protein L14-1
GO:0006518	peptide metabolic process	HORVU4Hr1G037800	3.9401	40S ribosomal protein S29
GO:0006518	peptide metabolic process	HORVU3Hr1G001140	2.21021	Ribosomal protein L6 family
GO:0006518	peptide metabolic process	HORVU7Hr1G063280	2.07901	60S ribosomal protein L27-3
GO:0006518	peptide metabolic process	HORVU7Hr1G052800	3.7658	60S ribosomal protein L32-1
GO:0006518	peptide metabolic process	HORVU3Hr1G113940	2.04495	eukaryotic translation initiation factor 4E
GO:0006518	peptide metabolic process	HORVU3Hr1G104200	3.43257	Eukaryotic peptide chain release factor subunit 1-2
GO:0006518	peptide metabolic process	HORVU2Hr1G080340	2.37935	60S ribosomal protein L34
GO:0006518	peptide metabolic process	HORVU2Hr1G029890	2.03594	40S ribosomal protein S6
GO:0006518	peptide metabolic process	HORVU7Hr1G088580	2.28053	40S ribosomal protein S24-2
GO:0006518	peptide metabolic process	HORVU5Hr1G104720	2.68682	30S ribosomal protein S13
GO:0006518	peptide metabolic process	HORVU6Hr1G044840	2.42076	40S ribosomal protein S24-2
GO:0006518	peptide metabolic process	HORVU3Hr1G015190	2.44885	30S ribosomal protein S7
GO:0006518	peptide metabolic process	HORVU5Hr1G052280	2.22485	60S ribosomal protein L17-1
GO:0006518	peptide metabolic process	HORVU5Hr1G092630	2.34034	60S ribosomal protein L5-1
GO:0006518	peptide metabolic process	HORVU4Hr1G070370	2.11556	40S ribosomal protein S3a
GO:0006518	peptide metabolic process	HORVU7Hr1G050170	2.14843	60S ribosomal protein L31
GO:0006518	peptide metabolic process	HORVU4Hr1G019980	2.28527	ribosomal protein 1
GO:0006518	peptide metabolic process	HORVU4Hr1G074270	2.41124	40S ribosomal protein S27
GO:0006518	peptide metabolic process	HORVU1Hr1G021700	2.14495	Histidine--tRNA ligase
GO:0006518	peptide metabolic process	HORVU7Hr1G080630	2.15076	60S ribosomal protein L22-2
GO:0006518	peptide metabolic process	HORVU7Hr1G014140	2.11452	40S ribosomal protein S20
GO:0006518	peptide metabolic process	HORVU3Hr1G051530	2.08378	50S ribosomal protein L25
GO:0006518	peptide metabolic process	HORVU6Hr1G058560	2.51905	60S ribosomal protein L14-1
GO:0006518	peptide metabolic process	HORVU4Hr1G055230	2.07073	40S ribosomal protein S7
GO:0006518	peptide metabolic process	HORVU6Hr1G070670	2.07713	60S ribosomal protein L31
GO:0043603	cellular amide metabolic process	HORVU2Hr1G102610	2.00014	60S ribosomal protein L12
GO:0043603	cellular amide metabolic process	HORVU7Hr1G052960	2.13654	60S ribosomal protein L32-1
GO:0043603	cellular amide metabolic process	HORVU6Hr1G041750	3.1927	60S ribosomal protein L6
GO:0043603	cellular amide metabolic process	HORVU5Hr1G048830	2.76601	60S ribosomal protein L15-1
GO:0043603	cellular amide metabolic process	HORVU4Hr1G084420	2.27548	60S ribosomal protein L21-2
GO:0043603	cellular amide metabolic process	HORVU2Hr1G089070	2.03537	60S ribosomal protein L14-1
GO:0043603	cellular amide metabolic process	HORVU3Hr1G086050	2.18427	30S ribosomal protein S5
GO:0043603	cellular amide metabolic process	HORVU2Hr1G099230	2.21685	40S ribosomal protein S11
GO:0043603	cellular amide metabolic process	HORVU2Hr1G089090	2.03537	60S ribosomal protein L14-1
GO:0043603	cellular amide metabolic process	HORVU4Hr1G037800	3.9401	40S ribosomal protein S29
GO:0043603	cellular amide metabolic process	HORVU3Hr1G001140	2.21021	Ribosomal protein L6 family
GO:0043603	cellular amide metabolic process	HORVU7Hr1G063280	2.07901	60S ribosomal protein L27-3
GO:0043603	cellular amide metabolic process	HORVU7Hr1G052800	3.7658	60S ribosomal protein L32-1
GO:0043603	cellular amide metabolic process	HORVU3Hr1G113940	2.04495	eukaryotic translation initiation factor 4E
GO:0043603	cellular amide metabolic process	HORVU3Hr1G104200	3.43257	Eukaryotic peptide chain release factor subunit 1-2
GO:0043603	cellular amide metabolic process	HORVU2Hr1G080340	2.37935	60S ribosomal protein L34
GO:0043603	cellular amide metabolic process	HORVU2Hr1G029890	2.03594	40S ribosomal protein S6
GO:0043603	cellular amide metabolic process	HORVU7Hr1G088580	2.28053	40S ribosomal protein S24-2
GO:0043603	cellular amide metabolic process	HORVU5Hr1G104720	2.68682	30S ribosomal protein S13
GO:0043603	cellular amide metabolic process	HORVU6Hr1G044840	2.42076	40S ribosomal protein S24-2
GO:0043603	cellular amide metabolic process	HORVU3Hr1G015190	2.44885	30S ribosomal protein S7
GO:0043603	cellular amide metabolic process	HORVU5Hr1G052280	2.22485	60S ribosomal protein L17-1
GO:0043603	cellular amide metabolic process	HORVU5Hr1G092630	2.34034	60S ribosomal protein L5-1
GO:0043603	cellular amide metabolic process	HORVU4Hr1G070370	2.11556	40S ribosomal protein S3a
GO:0043603	cellular amide metabolic process	HORVU7Hr1G050170	2.14843	60S ribosomal protein L31
GO:0043603	cellular amide metabolic process	HORVU4Hr1G019980	2.28527	ribosomal protein 1
GO:0043603	cellular amide metabolic process	HORVU4Hr1G074270	2.41124	40S ribosomal protein S27
GO:0043603	cellular amide metabolic process	HORVU1Hr1G021700	2.14495	Histidine--tRNA ligase
GO:0043603	cellular amide metabolic process	HORVU7Hr1G080630	2.15076	60S ribosomal protein L22-2
GO:0043603	cellular amide metabolic process	HORVU7Hr1G014140	2.11452	40S ribosomal protein S20
GO:0043603	cellular amide metabolic process	HORVU3Hr1G051530	2.08378	50S ribosomal protein L25
GO:0043603	cellular amide metabolic process	HORVU6Hr1G058560	2.51905	60S ribosomal protein L14-1
GO:0043603	cellular amide metabolic process	HORVU4Hr1G055230	2.07073	40S ribosomal protein S7
GO:0043603	cellular amide metabolic process	HORVU6Hr1G070670	2.07713	60S ribosomal protein L31
GO:1901564	organonitrogen compound metabolic process	HORVU2Hr1G102610	2.00014	60S ribosomal protein L12
GO:1901564	organonitrogen compound metabolic process	HORVU7Hr1G052960	2.13654	60S ribosomal protein L32-1
GO:1901564	organonitrogen compound metabolic process	HORVU4Hr1G037800	3.9401	40S ribosomal protein S29
GO:1901564	organonitrogen compound metabolic process	HORVU2Hr1G099230	2.21685	40S ribosomal protein S11
GO:1901564	organonitrogen compound metabolic process	HORVU6Hr1G041750	3.1927	60S ribosomal protein L6
GO:1901564	organonitrogen compound metabolic process	HORVU5Hr1G048830	2.76601	60S ribosomal protein L15-1
GO:1901564	organonitrogen compound metabolic process	HORVU4Hr1G084420	2.27548	60S ribosomal protein L21-2
GO:1901564	organonitrogen compound metabolic process	HORVU6Hr1G058750	2.31685	adenosine kinase 1
GO:1901564	organonitrogen compound metabolic process	HORVU2Hr1G089070	2.03537	60S ribosomal protein L14-1
GO:1901564	organonitrogen compound metabolic process	HORVU3Hr1G086050	2.18427	30S ribosomal protein S5
GO:1901564	organonitrogen compound metabolic process	HORVU2Hr1G029350	2.84422	adenylate kinase family protein
GO:1901564	organonitrogen compound metabolic process	HORVU2Hr1G089090	2.03537	60S ribosomal protein L14-1
GO:1901564	organonitrogen compound metabolic process	HORVU5Hr1G106090	3.05545	tryptophan synthase alpha chain
GO:1901564	organonitrogen compound metabolic process	HORVU5Hr1G043190	2.19088	2-isopropylmalate synthase 1
GO:1901564	organonitrogen compound metabolic process	HORVU3Hr1G001140	2.21021	Ribosomal protein L6 family
GO:1901564	organonitrogen compound metabolic process	HORVU7Hr1G063280	2.07901	60S ribosomal protein L27-3
GO:1901564	organonitrogen compound metabolic process	HORVU3Hr1G085760	4.52322	Gamma-glutamyl phosphate reductase
GO:1901564	organonitrogen compound metabolic process	HORVU7Hr1G052800	3.7658	60S ribosomal protein L32-1
GO:1901564	organonitrogen compound metabolic process	HORVU2Hr1G113180	6.31613	D-3-phosphoglycerate dehydrogenase
GO:1901564	organonitrogen compound metabolic process	HORVU3Hr1G113940	2.04495	eukaryotic translation initiation factor 4E
GO:1901564	organonitrogen compound metabolic process	HORVU3Hr1G104200	3.43257	Eukaryotic peptide chain release factor subunit 1-2
GO:1901564	organonitrogen compound metabolic process	HORVU2Hr1G080340	2.37935	60S ribosomal protein L34
GO:1901564	organonitrogen compound metabolic process	HORVU2Hr1G029890	2.03594	40S ribosomal protein S6
GO:1901564	organonitrogen compound metabolic process	HORVU7Hr1G114660	16.1792	Indole-3-glycerol phosphate synthase
GO:1901564	organonitrogen compound metabolic process	HORVU7Hr1G088580	2.28053	40S ribosomal protein S24-2
GO:1901564	organonitrogen compound metabolic process	HORVU1Hr1G072780	4.25991	Gamma-glutamyl phosphate reductase
GO:1901564	organonitrogen compound metabolic process	HORVU5Hr1G104720	2.68682	30S ribosomal protein S13
GO:1901564	organonitrogen compound metabolic process	HORVU6Hr1G044840	2.42076	40S ribosomal protein S24-2
GO:1901564	organonitrogen compound metabolic process	HORVU3Hr1G015190	2.44885	30S ribosomal protein S7
GO:1901564	organonitrogen compound metabolic process	HORVU5Hr1G052280	2.22485	60S ribosomal protein L17-1
GO:1901564	organonitrogen compound metabolic process	HORVU4Hr1G064790	28.1671	glutamate decarboxylase
GO:1901564	organonitrogen compound metabolic process	HORVU5Hr1G092630	2.34034	60S ribosomal protein L5-1
GO:1901564	organonitrogen compound metabolic process	HORVU4Hr1G070370	2.11556	40S ribosomal protein S3a
GO:1901564	organonitrogen compound metabolic process	HORVU7Hr1G050170	2.14843	60S ribosomal protein L31
GO:1901564	organonitrogen compound metabolic process	HORVU4Hr1G019980	2.28527	ribosomal protein 1
GO:1901564	organonitrogen compound metabolic process	HORVU4Hr1G074270	2.41124	40S ribosomal protein S27
GO:1901564	organonitrogen compound metabolic process	HORVU3Hr1G013910	3.09625	Asparagine synthetase [glutamine-hydrolyzing]
GO:1901564	organonitrogen compound metabolic process	HORVU1Hr1G021700	2.14495	Histidine--tRNA ligase
GO:1901564	organonitrogen compound metabolic process	HORVU7Hr1G080630	2.15076	60S ribosomal protein L22-2
GO:1901564	organonitrogen compound metabolic process	HORVU7Hr1G014140	2.11452	40S ribosomal protein S20
GO:1901564	organonitrogen compound metabolic process	HORVU3Hr1G051530	2.08378	50S ribosomal protein L25
GO:1901564	organonitrogen compound metabolic process	HORVU6Hr1G058560	2.51905	60S ribosomal protein L14-1
GO:1901564	organonitrogen compound metabolic process	HORVU4Hr1G055230	2.07073	40S ribosomal protein S7
GO:1901564	organonitrogen compound metabolic process	HORVU6Hr1G070670	2.07713	60S ribosomal protein L31
GO:1901564	organonitrogen compound metabolic process	HORVU4Hr1G044040	2.39651	Nucleoside diphosphate kinase family protein
GO:0006457	protein folding	HORVU7Hr1G080310	2.48889	T-complex protein 1 subunit gamma
GO:0006457	protein folding	HORVU7Hr1G117000	3.6327	Chaperone protein htpG family protein
GO:0006457	protein folding	HORVU5Hr1G027910	2.16385	Chaperone protein htpG family protein
GO:0006457	protein folding	HORVU6Hr1G091690	2.7889	T-complex protein 1 subunit zeta 1
GO:0006457	protein folding	HORVU5Hr1G075490	3.1805	Peptidyl-prolyl cis-trans isomerase
GO:0006457	protein folding	HORVU6Hr1G018370	3.05766	calnexin 1
GO:0006457	protein folding	HORVU2Hr1G067750	4.81729	Peptidyl-prolyl cis-trans isomerase
GO:0006457	protein folding	HORVU7Hr1G049370	7.02994	heat shock protein 81-3
GO:0006457	protein folding	HORVU4Hr1G089090	3.72677	Chaperone protein DnaK
GO:0006457	protein folding	HORVU7Hr1G034140	2.05083	T-complex protein 1 subunit delta
GO:0006457	protein folding	HORVU5Hr1G125130	2.45483	60 kDa chaperonin 2
GO:0006457	protein folding	HORVU6Hr1G025270	2.82643	T-complex protein 1 subunit eta
GO:0044249	cellular biosynthetic process	HORVU2Hr1G102610	2.00014	60S ribosomal protein L12
GO:0044249	cellular biosynthetic process	HORVU7Hr1G052960	2.13654	60S ribosomal protein L32-1
GO:0044249	cellular biosynthetic process	HORVU4Hr1G037800	3.9401	40S ribosomal protein S29
GO:0044249	cellular biosynthetic process	HORVU1Hr1G035600	2.5863	TATA-box-binding protein 1
GO:0044249	cellular biosynthetic process	HORVU6Hr1G041750	3.1927	60S ribosomal protein L6
GO:0044249	cellular biosynthetic process	HORVU5Hr1G048830	2.76601	60S ribosomal protein L15-1
GO:0044249	cellular biosynthetic process	HORVU3Hr1G104200	3.43257	Eukaryotic peptide chain release factor subunit 1-2
GO:0044249	cellular biosynthetic process	HORVU5Hr1G052280	2.22485	60S ribosomal protein L17-1
GO:0044249	cellular biosynthetic process	HORVU2Hr1G042370	18.1566	cellulose-synthase like D2
GO:0044249	cellular biosynthetic process	HORVU6Hr1G058750	2.31685	adenosine kinase 1
GO:0044249	cellular biosynthetic process	HORVU7Hr1G063280	2.07901	60S ribosomal protein L27-3
GO:0044249	cellular biosynthetic process	HORVU2Hr1G089070	2.03537	60S ribosomal protein L14-1
GO:0044249	cellular biosynthetic process	HORVU3Hr1G086050	2.18427	30S ribosomal protein S5
GO:0044249	cellular biosynthetic process	HORVU2Hr1G029350	2.84422	adenylate kinase family protein
GO:0044249	cellular biosynthetic process	HORVU2Hr1G089090	2.03537	60S ribosomal protein L14-1
GO:0044249	cellular biosynthetic process	HORVU4Hr1G084420	2.27548	60S ribosomal protein L21-2
GO:0044249	cellular biosynthetic process	HORVU6Hr1G014490	2.35318	General transcription factor IIH subunit 3
GO:0044249	cellular biosynthetic process	HORVU5Hr1G043190	2.19088	2-isopropylmalate synthase 1
GO:0044249	cellular biosynthetic process	HORVU3Hr1G001140	2.21021	Ribosomal protein L6 family
GO:0044249	cellular biosynthetic process	HORVU6Hr1G063560	2.11481	S-adenosylmethionine synthase 2
GO:0044249	cellular biosynthetic process	HORVU4Hr1G038960	3.1895	Alpha-1,4-glucan-protein synthase [UDP-forming]
GO:0044249	cellular biosynthetic process	HORVU2Hr1G095320	4.714	Heat stress transcription factor B-2a
GO:0044249	cellular biosynthetic process	HORVU6Hr1G063570	2.11481	S-adenosylmethionine synthase 2
GO:0044249	cellular biosynthetic process	HORVU3Hr1G085760	4.52322	Gamma-glutamyl phosphate reductase
GO:0044249	cellular biosynthetic process	HORVU4Hr1G070370	2.11556	40S ribosomal protein S3a
GO:0044249	cellular biosynthetic process	HORVU7Hr1G052800	3.7658	60S ribosomal protein L32-1
GO:0044249	cellular biosynthetic process	HORVU2Hr1G113180	6.31613	D-3-phosphoglycerate dehydrogenase
GO:0044249	cellular biosynthetic process	HORVU5Hr1G079060	4.8366	RNA polymerase II transcriptional coactivator KIWI
GO:0044249	cellular biosynthetic process	HORVU3Hr1G113940	2.04495	eukaryotic translation initiation factor 4E
GO:0044249	cellular biosynthetic process	HORVU2Hr1G119980	2.15666	Dolichyl-diphosphooligosaccharide--protein glycosyltransferase subunit STT3A
GO:0044249	cellular biosynthetic process	HORVU3Hr1G030620	3.0107	3-methyl-2-oxobutanoate hydroxymethyltransferase
GO:0044249	cellular biosynthetic process	HORVU2Hr1G080340	2.37935	60S ribosomal protein L34
GO:0044249	cellular biosynthetic process	HORVU6Hr1G039720	2.39121	GATA transcription factor 23
GO:0044249	cellular biosynthetic process	HORVU2Hr1G029890	2.03594	40S ribosomal protein S6
GO:0044249	cellular biosynthetic process	HORVU7Hr1G088580	2.28053	40S ribosomal protein S24-2
GO:0044249	cellular biosynthetic process	HORVU1Hr1G072780	4.25991	Gamma-glutamyl phosphate reductase
GO:0044249	cellular biosynthetic process	HORVU5Hr1G104720	2.68682	30S ribosomal protein S13
GO:0044249	cellular biosynthetic process	HORVU6Hr1G044840	2.42076	40S ribosomal protein S24-2
GO:0044249	cellular biosynthetic process	HORVU3Hr1G015190	2.44885	30S ribosomal protein S7
GO:0044249	cellular biosynthetic process	HORVU2Hr1G101770	4.47546	Growth-regulating factor 3
GO:0044249	cellular biosynthetic process	HORVU5Hr1G092630	2.34034	60S ribosomal protein L5-1
GO:0044249	cellular biosynthetic process	HORVU2Hr1G099230	2.21685	40S ribosomal protein S11
GO:0044249	cellular biosynthetic process	HORVU7Hr1G050170	2.14843	60S ribosomal protein L31
GO:0044249	cellular biosynthetic process	HORVU4Hr1G019980	2.28527	ribosomal protein 1
GO:0044249	cellular biosynthetic process	HORVU4Hr1G074270	2.41124	40S ribosomal protein S27
GO:0044249	cellular biosynthetic process	HORVU2Hr1G119960	2.15666	Dolichyl-diphosphooligosaccharide--protein glycosyltransferase subunit STT3A
GO:0044249	cellular biosynthetic process	HORVU3Hr1G013910	3.09625	Asparagine synthetase [glutamine-hydrolyzing]
GO:0044249	cellular biosynthetic process	HORVU1Hr1G021700	2.14495	Histidine--tRNA ligase
GO:0044249	cellular biosynthetic process	HORVU7Hr1G080630	2.15076	60S ribosomal protein L22-2
GO:0044249	cellular biosynthetic process	HORVU7Hr1G014140	2.11452	40S ribosomal protein S20
GO:0044249	cellular biosynthetic process	HORVU3Hr1G050590	4.21845	WRKY DNA-binding protein 50
GO:0044249	cellular biosynthetic process	HORVU3Hr1G051530	2.08378	50S ribosomal protein L25
GO:0044249	cellular biosynthetic process	HORVU7Hr1G034560	2.09799	Choline/ethanolaminephosphotransferase 1
GO:0044249	cellular biosynthetic process	HORVU6Hr1G058560	2.51905	60S ribosomal protein L14-1
GO:0044249	cellular biosynthetic process	HORVU4Hr1G055230	2.07073	40S ribosomal protein S7
GO:0044249	cellular biosynthetic process	HORVU6Hr1G070670	2.07713	60S ribosomal protein L31
GO:0044249	cellular biosynthetic process	HORVU1Hr1G039250	3.53868	cellulose synthase A4
GO:0044249	cellular biosynthetic process	HORVU4Hr1G044040	2.39651	Nucleoside diphosphate kinase family protein
GO:0044249	cellular biosynthetic process	HORVU6Hr1G050750	2.17756	Cellulose synthase family protein
GO:1901576	organic substance biosynthetic process	HORVU2Hr1G102610	2.00014	60S ribosomal protein L12
GO:1901576	organic substance biosynthetic process	HORVU7Hr1G052960	2.13654	60S ribosomal protein L32-1
GO:1901576	organic substance biosynthetic process	HORVU4Hr1G037800	3.9401	40S ribosomal protein S29
GO:1901576	organic substance biosynthetic process	HORVU1Hr1G035600	2.5863	TATA-box-binding protein 1
GO:1901576	organic substance biosynthetic process	HORVU6Hr1G041750	3.1927	60S ribosomal protein L6
GO:1901576	organic substance biosynthetic process	HORVU5Hr1G048830	2.76601	60S ribosomal protein L15-1
GO:1901576	organic substance biosynthetic process	HORVU3Hr1G104200	3.43257	Eukaryotic peptide chain release factor subunit 1-2
GO:1901576	organic substance biosynthetic process	HORVU5Hr1G052280	2.22485	60S ribosomal protein L17-1
GO:1901576	organic substance biosynthetic process	HORVU2Hr1G042370	18.1566	cellulose-synthase like D2
GO:1901576	organic substance biosynthetic process	HORVU6Hr1G058750	2.31685	adenosine kinase 1
GO:1901576	organic substance biosynthetic process	HORVU2Hr1G089070	2.03537	60S ribosomal protein L14-1
GO:1901576	organic substance biosynthetic process	HORVU3Hr1G086050	2.18427	30S ribosomal protein S5
GO:1901576	organic substance biosynthetic process	HORVU2Hr1G029350	2.84422	adenylate kinase family protein
GO:1901576	organic substance biosynthetic process	HORVU2Hr1G089090	2.03537	60S ribosomal protein L14-1
GO:1901576	organic substance biosynthetic process	HORVU4Hr1G084420	2.27548	60S ribosomal protein L21-2
GO:1901576	organic substance biosynthetic process	HORVU6Hr1G014490	2.35318	General transcription factor IIH subunit 3
GO:1901576	organic substance biosynthetic process	HORVU5Hr1G043190	2.19088	2-isopropylmalate synthase 1
GO:1901576	organic substance biosynthetic process	HORVU3Hr1G001140	2.21021	Ribosomal protein L6 family
GO:1901576	organic substance biosynthetic process	HORVU7Hr1G063280	2.07901	60S ribosomal protein L27-3
GO:1901576	organic substance biosynthetic process	HORVU4Hr1G038960	3.1895	Alpha-1,4-glucan-protein synthase [UDP-forming]
GO:1901576	organic substance biosynthetic process	HORVU2Hr1G095320	4.714	Heat stress transcription factor B-2a
GO:1901576	organic substance biosynthetic process	HORVU3Hr1G085760	4.52322	Gamma-glutamyl phosphate reductase
GO:1901576	organic substance biosynthetic process	HORVU4Hr1G070370	2.11556	40S ribosomal protein S3a
GO:1901576	organic substance biosynthetic process	HORVU7Hr1G052800	3.7658	60S ribosomal protein L32-1
GO:1901576	organic substance biosynthetic process	HORVU2Hr1G113180	6.31613	D-3-phosphoglycerate dehydrogenase
GO:1901576	organic substance biosynthetic process	HORVU5Hr1G079060	4.8366	RNA polymerase II transcriptional coactivator KIWI
GO:1901576	organic substance biosynthetic process	HORVU3Hr1G113940	2.04495	eukaryotic translation initiation factor 4E
GO:1901576	organic substance biosynthetic process	HORVU2Hr1G119980	2.15666	Dolichyl-diphosphooligosaccharide--protein glycosyltransferase subunit STT3A
GO:1901576	organic substance biosynthetic process	HORVU3Hr1G030620	3.0107	3-methyl-2-oxobutanoate hydroxymethyltransferase
GO:1901576	organic substance biosynthetic process	HORVU2Hr1G080340	2.37935	60S ribosomal protein L34
GO:1901576	organic substance biosynthetic process	HORVU6Hr1G039720	2.39121	GATA transcription factor 23
GO:1901576	organic substance biosynthetic process	HORVU2Hr1G029890	2.03594	40S ribosomal protein S6
GO:1901576	organic substance biosynthetic process	HORVU7Hr1G088580	2.28053	40S ribosomal protein S24-2
GO:1901576	organic substance biosynthetic process	HORVU1Hr1G072780	4.25991	Gamma-glutamyl phosphate reductase
GO:1901576	organic substance biosynthetic process	HORVU5Hr1G104720	2.68682	30S ribosomal protein S13
GO:1901576	organic substance biosynthetic process	HORVU6Hr1G044840	2.42076	40S ribosomal protein S24-2
GO:1901576	organic substance biosynthetic process	HORVU3Hr1G015190	2.44885	30S ribosomal protein S7
GO:1901576	organic substance biosynthetic process	HORVU2Hr1G101770	4.47546	Growth-regulating factor 3
GO:1901576	organic substance biosynthetic process	HORVU5Hr1G092630	2.34034	60S ribosomal protein L5-1
GO:1901576	organic substance biosynthetic process	HORVU2Hr1G099230	2.21685	40S ribosomal protein S11
GO:1901576	organic substance biosynthetic process	HORVU7Hr1G050170	2.14843	60S ribosomal protein L31
GO:1901576	organic substance biosynthetic process	HORVU4Hr1G019980	2.28527	ribosomal protein 1
GO:1901576	organic substance biosynthetic process	HORVU4Hr1G074270	2.41124	40S ribosomal protein S27
GO:1901576	organic substance biosynthetic process	HORVU2Hr1G119960	2.15666	Dolichyl-diphosphooligosaccharide--protein glycosyltransferase subunit STT3A
GO:1901576	organic substance biosynthetic process	HORVU3Hr1G013910	3.09625	Asparagine synthetase [glutamine-hydrolyzing]
GO:1901576	organic substance biosynthetic process	HORVU1Hr1G021700	2.14495	Histidine--tRNA ligase
GO:1901576	organic substance biosynthetic process	HORVU7Hr1G080630	2.15076	60S ribosomal protein L22-2
GO:1901576	organic substance biosynthetic process	HORVU7Hr1G014140	2.11452	40S ribosomal protein S20
GO:1901576	organic substance biosynthetic process	HORVU3Hr1G050590	4.21845	WRKY DNA-binding protein 50
GO:1901576	organic substance biosynthetic process	HORVU3Hr1G051530	2.08378	50S ribosomal protein L25
GO:1901576	organic substance biosynthetic process	HORVU7Hr1G034560	2.09799	Choline/ethanolaminephosphotransferase 1
GO:1901576	organic substance biosynthetic process	HORVU6Hr1G058560	2.51905	60S ribosomal protein L14-1
GO:1901576	organic substance biosynthetic process	HORVU4Hr1G055230	2.07073	40S ribosomal protein S7
GO:1901576	organic substance biosynthetic process	HORVU6Hr1G070670	2.07713	60S ribosomal protein L31
GO:1901576	organic substance biosynthetic process	HORVU1Hr1G039250	3.53868	cellulose synthase A4
GO:1901576	organic substance biosynthetic process	HORVU4Hr1G044040	2.39651	Nucleoside diphosphate kinase family protein
GO:1901576	organic substance biosynthetic process	HORVU6Hr1G050750	2.17756	Cellulose synthase family protein
GO:0034645	cellular macromolecule biosynthetic process	HORVU2Hr1G102610	2.00014	60S ribosomal protein L12
GO:0034645	cellular macromolecule biosynthetic process	HORVU7Hr1G052960	2.13654	60S ribosomal protein L32-1
GO:0034645	cellular macromolecule biosynthetic process	HORVU1Hr1G035600	2.5863	TATA-box-binding protein 1
GO:0034645	cellular macromolecule biosynthetic process	HORVU6Hr1G041750	3.1927	60S ribosomal protein L6
GO:0034645	cellular macromolecule biosynthetic process	HORVU5Hr1G048830	2.76601	60S ribosomal protein L15-1
GO:0034645	cellular macromolecule biosynthetic process	HORVU3Hr1G104200	3.43257	Eukaryotic peptide chain release factor subunit 1-2
GO:0034645	cellular macromolecule biosynthetic process	HORVU5Hr1G052280	2.22485	60S ribosomal protein L17-1
GO:0034645	cellular macromolecule biosynthetic process	HORVU2Hr1G042370	18.1566	cellulose-synthase like D2
GO:0034645	cellular macromolecule biosynthetic process	HORVU2Hr1G089070	2.03537	60S ribosomal protein L14-1
GO:0034645	cellular macromolecule biosynthetic process	HORVU3Hr1G086050	2.18427	30S ribosomal protein S5
GO:0034645	cellular macromolecule biosynthetic process	HORVU2Hr1G099230	2.21685	40S ribosomal protein S11
GO:0034645	cellular macromolecule biosynthetic process	HORVU2Hr1G089090	2.03537	60S ribosomal protein L14-1
GO:0034645	cellular macromolecule biosynthetic process	HORVU4Hr1G084420	2.27548	60S ribosomal protein L21-2
GO:0034645	cellular macromolecule biosynthetic process	HORVU6Hr1G014490	2.35318	General transcription factor IIH subunit 3
GO:0034645	cellular macromolecule biosynthetic process	HORVU4Hr1G037800	3.9401	40S ribosomal protein S29
GO:0034645	cellular macromolecule biosynthetic process	HORVU3Hr1G001140	2.21021	Ribosomal protein L6 family
GO:0034645	cellular macromolecule biosynthetic process	HORVU7Hr1G063280	2.07901	60S ribosomal protein L27-3
GO:0034645	cellular macromolecule biosynthetic process	HORVU4Hr1G038960	3.1895	Alpha-1,4-glucan-protein synthase [UDP-forming]
GO:0034645	cellular macromolecule biosynthetic process	HORVU2Hr1G095320	4.714	Heat stress transcription factor B-2a
GO:0034645	cellular macromolecule biosynthetic process	HORVU7Hr1G052800	3.7658	60S ribosomal protein L32-1
GO:0034645	cellular macromolecule biosynthetic process	HORVU3Hr1G113940	2.04495	eukaryotic translation initiation factor 4E
GO:0034645	cellular macromolecule biosynthetic process	HORVU2Hr1G119980	2.15666	Dolichyl-diphosphooligosaccharide--protein glycosyltransferase subunit STT3A
GO:0034645	cellular macromolecule biosynthetic process	HORVU2Hr1G080340	2.37935	60S ribosomal protein L34
GO:0034645	cellular macromolecule biosynthetic process	HORVU6Hr1G039720	2.39121	GATA transcription factor 23
GO:0034645	cellular macromolecule biosynthetic process	HORVU2Hr1G029890	2.03594	40S ribosomal protein S6
GO:0034645	cellular macromolecule biosynthetic process	HORVU7Hr1G088580	2.28053	40S ribosomal protein S24-2
GO:0034645	cellular macromolecule biosynthetic process	HORVU5Hr1G104720	2.68682	30S ribosomal protein S13
GO:0034645	cellular macromolecule biosynthetic process	HORVU6Hr1G044840	2.42076	40S ribosomal protein S24-2
GO:0034645	cellular macromolecule biosynthetic process	HORVU3Hr1G015190	2.44885	30S ribosomal protein S7
GO:0034645	cellular macromolecule biosynthetic process	HORVU2Hr1G101770	4.47546	Growth-regulating factor 3
GO:0034645	cellular macromolecule biosynthetic process	HORVU5Hr1G092630	2.34034	60S ribosomal protein L5-1
GO:0034645	cellular macromolecule biosynthetic process	HORVU4Hr1G070370	2.11556	40S ribosomal protein S3a
GO:0034645	cellular macromolecule biosynthetic process	HORVU7Hr1G050170	2.14843	60S ribosomal protein L31
GO:0034645	cellular macromolecule biosynthetic process	HORVU4Hr1G019980	2.28527	ribosomal protein 1
GO:0034645	cellular macromolecule biosynthetic process	HORVU4Hr1G074270	2.41124	40S ribosomal protein S27
GO:0034645	cellular macromolecule biosynthetic process	HORVU2Hr1G119960	2.15666	Dolichyl-diphosphooligosaccharide--protein glycosyltransferase subunit STT3A
GO:0034645	cellular macromolecule biosynthetic process	HORVU1Hr1G021700	2.14495	Histidine--tRNA ligase
GO:0034645	cellular macromolecule biosynthetic process	HORVU7Hr1G080630	2.15076	60S ribosomal protein L22-2
GO:0034645	cellular macromolecule biosynthetic process	HORVU7Hr1G014140	2.11452	40S ribosomal protein S20
GO:0034645	cellular macromolecule biosynthetic process	HORVU3Hr1G050590	4.21845	WRKY DNA-binding protein 50
GO:0034645	cellular macromolecule biosynthetic process	HORVU3Hr1G051530	2.08378	50S ribosomal protein L25
GO:0034645	cellular macromolecule biosynthetic process	HORVU5Hr1G079060	4.8366	RNA polymerase II transcriptional coactivator KIWI
GO:0034645	cellular macromolecule biosynthetic process	HORVU6Hr1G058560	2.51905	60S ribosomal protein L14-1
GO:0034645	cellular macromolecule biosynthetic process	HORVU4Hr1G055230	2.07073	40S ribosomal protein S7
GO:0034645	cellular macromolecule biosynthetic process	HORVU6Hr1G070670	2.07713	60S ribosomal protein L31
GO:0034645	cellular macromolecule biosynthetic process	HORVU1Hr1G039250	3.53868	cellulose synthase A4
GO:0034645	cellular macromolecule biosynthetic process	HORVU6Hr1G050750	2.17756	Cellulose synthase family protein
GO:0009059	macromolecule biosynthetic process	HORVU2Hr1G102610	2.00014	60S ribosomal protein L12
GO:0009059	macromolecule biosynthetic process	HORVU7Hr1G052960	2.13654	60S ribosomal protein L32-1
GO:0009059	macromolecule biosynthetic process	HORVU1Hr1G035600	2.5863	TATA-box-binding protein 1
GO:0009059	macromolecule biosynthetic process	HORVU6Hr1G041750	3.1927	60S ribosomal protein L6
GO:0009059	macromolecule biosynthetic process	HORVU5Hr1G048830	2.76601	60S ribosomal protein L15-1
GO:0009059	macromolecule biosynthetic process	HORVU3Hr1G104200	3.43257	Eukaryotic peptide chain release factor subunit 1-2
GO:0009059	macromolecule biosynthetic process	HORVU5Hr1G052280	2.22485	60S ribosomal protein L17-1
GO:0009059	macromolecule biosynthetic process	HORVU2Hr1G042370	18.1566	cellulose-synthase like D2
GO:0009059	macromolecule biosynthetic process	HORVU2Hr1G089070	2.03537	60S ribosomal protein L14-1
GO:0009059	macromolecule biosynthetic process	HORVU3Hr1G086050	2.18427	30S ribosomal protein S5
GO:0009059	macromolecule biosynthetic process	HORVU2Hr1G099230	2.21685	40S ribosomal protein S11
GO:0009059	macromolecule biosynthetic process	HORVU2Hr1G089090	2.03537	60S ribosomal protein L14-1
GO:0009059	macromolecule biosynthetic process	HORVU4Hr1G084420	2.27548	60S ribosomal protein L21-2
GO:0009059	macromolecule biosynthetic process	HORVU6Hr1G014490	2.35318	General transcription factor IIH subunit 3
GO:0009059	macromolecule biosynthetic process	HORVU4Hr1G037800	3.9401	40S ribosomal protein S29
GO:0009059	macromolecule biosynthetic process	HORVU3Hr1G001140	2.21021	Ribosomal protein L6 family
GO:0009059	macromolecule biosynthetic process	HORVU7Hr1G063280	2.07901	60S ribosomal protein L27-3
GO:0009059	macromolecule biosynthetic process	HORVU4Hr1G038960	3.1895	Alpha-1,4-glucan-protein synthase [UDP-forming]
GO:0009059	macromolecule biosynthetic process	HORVU2Hr1G095320	4.714	Heat stress transcription factor B-2a
GO:0009059	macromolecule biosynthetic process	HORVU7Hr1G052800	3.7658	60S ribosomal protein L32-1
GO:0009059	macromolecule biosynthetic process	HORVU3Hr1G113940	2.04495	eukaryotic translation initiation factor 4E
GO:0009059	macromolecule biosynthetic process	HORVU2Hr1G119980	2.15666	Dolichyl-diphosphooligosaccharide--protein glycosyltransferase subunit STT3A
GO:0009059	macromolecule biosynthetic process	HORVU2Hr1G080340	2.37935	60S ribosomal protein L34
GO:0009059	macromolecule biosynthetic process	HORVU6Hr1G039720	2.39121	GATA transcription factor 23
GO:0009059	macromolecule biosynthetic process	HORVU2Hr1G029890	2.03594	40S ribosomal protein S6
GO:0009059	macromolecule biosynthetic process	HORVU7Hr1G088580	2.28053	40S ribosomal protein S24-2
GO:0009059	macromolecule biosynthetic process	HORVU5Hr1G104720	2.68682	30S ribosomal protein S13
GO:0009059	macromolecule biosynthetic process	HORVU6Hr1G044840	2.42076	40S ribosomal protein S24-2
GO:0009059	macromolecule biosynthetic process	HORVU3Hr1G015190	2.44885	30S ribosomal protein S7
GO:0009059	macromolecule biosynthetic process	HORVU2Hr1G101770	4.47546	Growth-regulating factor 3
GO:0009059	macromolecule biosynthetic process	HORVU5Hr1G092630	2.34034	60S ribosomal protein L5-1
GO:0009059	macromolecule biosynthetic process	HORVU4Hr1G070370	2.11556	40S ribosomal protein S3a
GO:0009059	macromolecule biosynthetic process	HORVU7Hr1G050170	2.14843	60S ribosomal protein L31
GO:0009059	macromolecule biosynthetic process	HORVU4Hr1G019980	2.28527	ribosomal protein 1
GO:0009059	macromolecule biosynthetic process	HORVU4Hr1G074270	2.41124	40S ribosomal protein S27
GO:0009059	macromolecule biosynthetic process	HORVU2Hr1G119960	2.15666	Dolichyl-diphosphooligosaccharide--protein glycosyltransferase subunit STT3A
GO:0009059	macromolecule biosynthetic process	HORVU1Hr1G021700	2.14495	Histidine--tRNA ligase
GO:0009059	macromolecule biosynthetic process	HORVU7Hr1G080630	2.15076	60S ribosomal protein L22-2
GO:0009059	macromolecule biosynthetic process	HORVU7Hr1G014140	2.11452	40S ribosomal protein S20
GO:0009059	macromolecule biosynthetic process	HORVU3Hr1G050590	4.21845	WRKY DNA-binding protein 50
GO:0009059	macromolecule biosynthetic process	HORVU3Hr1G051530	2.08378	50S ribosomal protein L25
GO:0009059	macromolecule biosynthetic process	HORVU5Hr1G079060	4.8366	RNA polymerase II transcriptional coactivator KIWI
GO:0009059	macromolecule biosynthetic process	HORVU6Hr1G058560	2.51905	60S ribosomal protein L14-1
GO:0009059	macromolecule biosynthetic process	HORVU4Hr1G055230	2.07073	40S ribosomal protein S7
GO:0009059	macromolecule biosynthetic process	HORVU6Hr1G070670	2.07713	60S ribosomal protein L31
GO:0009059	macromolecule biosynthetic process	HORVU1Hr1G039250	3.53868	cellulose synthase A4
GO:0009059	macromolecule biosynthetic process	HORVU6Hr1G050750	2.17756	Cellulose synthase family protein
GO:0009058	biosynthetic process	HORVU2Hr1G102610	2.00014	60S ribosomal protein L12
GO:0009058	biosynthetic process	HORVU7Hr1G052960	2.13654	60S ribosomal protein L32-1
GO:0009058	biosynthetic process	HORVU4Hr1G037800	3.9401	40S ribosomal protein S29
GO:0009058	biosynthetic process	HORVU1Hr1G035600	2.5863	TATA-box-binding protein 1
GO:0009058	biosynthetic process	HORVU6Hr1G041750	3.1927	60S ribosomal protein L6
GO:0009058	biosynthetic process	HORVU5Hr1G048830	2.76601	60S ribosomal protein L15-1
GO:0009058	biosynthetic process	HORVU3Hr1G104200	3.43257	Eukaryotic peptide chain release factor subunit 1-2
GO:0009058	biosynthetic process	HORVU5Hr1G052280	2.22485	60S ribosomal protein L17-1
GO:0009058	biosynthetic process	HORVU2Hr1G042370	18.1566	cellulose-synthase like D2
GO:0009058	biosynthetic process	HORVU6Hr1G058750	2.31685	adenosine kinase 1
GO:0009058	biosynthetic process	HORVU7Hr1G063280	2.07901	60S ribosomal protein L27-3
GO:0009058	biosynthetic process	HORVU2Hr1G089070	2.03537	60S ribosomal protein L14-1
GO:0009058	biosynthetic process	HORVU3Hr1G086050	2.18427	30S ribosomal protein S5
GO:0009058	biosynthetic process	HORVU2Hr1G029350	2.84422	adenylate kinase family protein
GO:0009058	biosynthetic process	HORVU2Hr1G089090	2.03537	60S ribosomal protein L14-1
GO:0009058	biosynthetic process	HORVU4Hr1G084420	2.27548	60S ribosomal protein L21-2
GO:0009058	biosynthetic process	HORVU6Hr1G014490	2.35318	General transcription factor IIH subunit 3
GO:0009058	biosynthetic process	HORVU5Hr1G043190	2.19088	2-isopropylmalate synthase 1
GO:0009058	biosynthetic process	HORVU3Hr1G001140	2.21021	Ribosomal protein L6 family
GO:0009058	biosynthetic process	HORVU6Hr1G063560	2.11481	S-adenosylmethionine synthase 2
GO:0009058	biosynthetic process	HORVU4Hr1G038960	3.1895	Alpha-1,4-glucan-protein synthase [UDP-forming]
GO:0009058	biosynthetic process	HORVU2Hr1G095320	4.714	Heat stress transcription factor B-2a
GO:0009058	biosynthetic process	HORVU6Hr1G063570	2.11481	S-adenosylmethionine synthase 2
GO:0009058	biosynthetic process	HORVU3Hr1G085760	4.52322	Gamma-glutamyl phosphate reductase
GO:0009058	biosynthetic process	HORVU4Hr1G070370	2.11556	40S ribosomal protein S3a
GO:0009058	biosynthetic process	HORVU7Hr1G052800	3.7658	60S ribosomal protein L32-1
GO:0009058	biosynthetic process	HORVU2Hr1G113180	6.31613	D-3-phosphoglycerate dehydrogenase
GO:0009058	biosynthetic process	HORVU5Hr1G079060	4.8366	RNA polymerase II transcriptional coactivator KIWI
GO:0009058	biosynthetic process	HORVU3Hr1G113940	2.04495	eukaryotic translation initiation factor 4E
GO:0009058	biosynthetic process	HORVU2Hr1G119980	2.15666	Dolichyl-diphosphooligosaccharide--protein glycosyltransferase subunit STT3A
GO:0009058	biosynthetic process	HORVU3Hr1G030620	3.0107	3-methyl-2-oxobutanoate hydroxymethyltransferase
GO:0009058	biosynthetic process	HORVU2Hr1G080340	2.37935	60S ribosomal protein L34
GO:0009058	biosynthetic process	HORVU6Hr1G039720	2.39121	GATA transcription factor 23
GO:0009058	biosynthetic process	HORVU2Hr1G029890	2.03594	40S ribosomal protein S6
GO:0009058	biosynthetic process	HORVU7Hr1G088580	2.28053	40S ribosomal protein S24-2
GO:0009058	biosynthetic process	HORVU1Hr1G072780	4.25991	Gamma-glutamyl phosphate reductase
GO:0009058	biosynthetic process	HORVU5Hr1G104720	2.68682	30S ribosomal protein S13
GO:0009058	biosynthetic process	HORVU6Hr1G044840	2.42076	40S ribosomal protein S24-2
GO:0009058	biosynthetic process	HORVU3Hr1G015190	2.44885	30S ribosomal protein S7
GO:0009058	biosynthetic process	HORVU2Hr1G101770	4.47546	Growth-regulating factor 3
GO:0009058	biosynthetic process	HORVU5Hr1G092630	2.34034	60S ribosomal protein L5-1
GO:0009058	biosynthetic process	HORVU2Hr1G099230	2.21685	40S ribosomal protein S11
GO:0009058	biosynthetic process	HORVU7Hr1G050170	2.14843	60S ribosomal protein L31
GO:0009058	biosynthetic process	HORVU4Hr1G019980	2.28527	ribosomal protein 1
GO:0009058	biosynthetic process	HORVU4Hr1G074270	2.41124	40S ribosomal protein S27
GO:0009058	biosynthetic process	HORVU2Hr1G119960	2.15666	Dolichyl-diphosphooligosaccharide--protein glycosyltransferase subunit STT3A
GO:0009058	biosynthetic process	HORVU3Hr1G013910	3.09625	Asparagine synthetase [glutamine-hydrolyzing]
GO:0009058	biosynthetic process	HORVU1Hr1G021700	2.14495	Histidine--tRNA ligase
GO:0009058	biosynthetic process	HORVU7Hr1G080630	2.15076	60S ribosomal protein L22-2
GO:0009058	biosynthetic process	HORVU7Hr1G014140	2.11452	40S ribosomal protein S20
GO:0009058	biosynthetic process	HORVU3Hr1G050590	4.21845	WRKY DNA-binding protein 50
GO:0009058	biosynthetic process	HORVU3Hr1G051530	2.08378	50S ribosomal protein L25
GO:0009058	biosynthetic process	HORVU7Hr1G034560	2.09799	Choline/ethanolaminephosphotransferase 1
GO:0009058	biosynthetic process	HORVU6Hr1G058560	2.51905	60S ribosomal protein L14-1
GO:0009058	biosynthetic process	HORVU4Hr1G055230	2.07073	40S ribosomal protein S7
GO:0009058	biosynthetic process	HORVU6Hr1G070670	2.07713	60S ribosomal protein L31
GO:0009058	biosynthetic process	HORVU1Hr1G039250	3.53868	cellulose synthase A4
GO:0009058	biosynthetic process	HORVU4Hr1G044040	2.39651	Nucleoside diphosphate kinase family protein
GO:0009058	biosynthetic process	HORVU6Hr1G050750	2.17756	Cellulose synthase family protein
GO:0009987	cellular process	HORVU7Hr1G052960	2.13654	60S ribosomal protein L32-1
GO:0009987	cellular process	HORVU3Hr1G059850	7.06407	receptor kinase 2
GO:0009987	cellular process	HORVU2Hr1G067750	4.81729	Peptidyl-prolyl cis-trans isomerase
GO:0009987	cellular process	HORVU7Hr1G063280	2.07901	60S ribosomal protein L27-3
GO:0009987	cellular process	HORVU2Hr1G089070	2.03537	60S ribosomal protein L14-1
GO:0009987	cellular process	HORVU2Hr1G099230	2.21685	40S ribosomal protein S11
GO:0009987	cellular process	HORVU5Hr1G106090	3.05545	tryptophan synthase alpha chain
GO:0009987	cellular process	HORVU2Hr1G110120	5.01254	Adenosylhomocysteinase
GO:0009987	cellular process	HORVU7Hr1G106380	3.15356	Geranylgeranyl transferase type-2 subunit alpha
GO:0009987	cellular process	HORVU4Hr1G005100	2.12077	Tudor domain-containing protein 1
GO:0009987	cellular process	HORVU3Hr1G113940	2.04495	eukaryotic translation initiation factor 4E
GO:0009987	cellular process	HORVU7Hr1G117000	3.6327	Chaperone protein htpG family protein
GO:0009987	cellular process	HORVU1Hr1G072780	4.25991	Gamma-glutamyl phosphate reductase
GO:0009987	cellular process	HORVU1Hr1G068170	3.47746	tubulin beta chain 2
GO:0009987	cellular process	HORVU7Hr1G114620	2.40597	Protein kinase superfamily protein
GO:0009987	cellular process	HORVU3Hr1G096250	3.7042	Histone-lysine N-methyltransferase 2B
GO:0009987	cellular process	HORVU4Hr1G074270	2.41124	40S ribosomal protein S27
GO:0009987	cellular process	HORVU2Hr1G119960	2.15666	Dolichyl-diphosphooligosaccharide--protein glycosyltransferase subunit STT3A
GO:0009987	cellular process	HORVU6Hr1G091690	2.7889	T-complex protein 1 subunit zeta 1
GO:0009987	cellular process	HORVU2Hr1G120470	3.25251	uracil dna glycosylase
GO:0009987	cellular process	HORVU7Hr1G107100	2.02681	tubulin beta chain 2
GO:0009987	cellular process	HORVU7Hr1G014140	2.11452	40S ribosomal protein S20
GO:0009987	cellular process	HORVU3Hr1G051530	2.08378	50S ribosomal protein L25
GO:0009987	cellular process	HORVU4Hr1G007550	2.12973	receptor-like kinase 902
GO:0009987	cellular process	HORVU6Hr1G025270	2.82643	T-complex protein 1 subunit eta
GO:0009987	cellular process	HORVU2Hr1G102610	2.00014	60S ribosomal protein L12
GO:0009987	cellular process	HORVU5Hr1G117910	2.16105	ferredoxin 3
GO:0009987	cellular process	HORVU1Hr1G035600	2.5863	TATA-box-binding protein 1
GO:0009987	cellular process	HORVU3Hr1G002070	2.71335	receptor-like protein kinase 4
GO:0009987	cellular process	HORVU3Hr1G006640	14.1418	receptor kinase 2
GO:0009987	cellular process	HORVU2Hr1G042370	18.1566	cellulose-synthase like D2
GO:0009987	cellular process	HORVU6Hr1G058750	2.31685	adenosine kinase 1
GO:0009987	cellular process	HORVU2Hr1G003540	5.42105	Disease resistance protein (CC-NBS-LRR class) family
GO:0009987	cellular process	HORVU5Hr1G043190	2.19088	2-isopropylmalate synthase 1
GO:0009987	cellular process	HORVU3Hr1G001140	2.21021	Ribosomal protein L6 family
GO:0009987	cellular process	HORVU1Hr1G031370	2.052	tRNA pseudouridine synthase A 1
GO:0009987	cellular process	HORVU6Hr1G004440	12.5214	Protein kinase family protein
GO:0009987	cellular process	HORVU7Hr1G052800	3.7658	60S ribosomal protein L32-1
GO:0009987	cellular process	HORVU2Hr1G113180	6.31613	D-3-phosphoglycerate dehydrogenase
GO:0009987	cellular process	HORVU1Hr1G022810	2.91747	Protein disulfide isomerase-like 2-1
GO:0009987	cellular process	HORVU2Hr1G119980	2.15666	Dolichyl-diphosphooligosaccharide--protein glycosyltransferase subunit STT3A
GO:0009987	cellular process	HORVU5Hr1G027910	2.16385	Chaperone protein htpG family protein
GO:0009987	cellular process	HORVU6Hr1G039720	2.39121	GATA transcription factor 23
GO:0009987	cellular process	HORVU6Hr1G044840	2.42076	40S ribosomal protein S24-2
GO:0009987	cellular process	HORVU3Hr1G015190	2.44885	30S ribosomal protein S7
GO:0009987	cellular process	HORVU4Hr1G070370	2.11556	40S ribosomal protein S3a
GO:0009987	cellular process	HORVU7Hr1G050170	2.14843	60S ribosomal protein L31
GO:0009987	cellular process	HORVU6Hr1G070670	2.07713	60S ribosomal protein L31
GO:0009987	cellular process	HORVU7Hr1G034140	2.05083	T-complex protein 1 subunit delta
GO:0009987	cellular process	HORVU4Hr1G044040	2.39651	Nucleoside diphosphate kinase family protein
GO:0009987	cellular process	HORVU6Hr1G050750	2.17756	Cellulose synthase family protein
GO:0009987	cellular process	HORVU3Hr1G086160	5.62893	laccase 17
GO:0009987	cellular process	HORVU6Hr1G004340	12.5214	receptor-like protein kinase 2
GO:0009987	cellular process	HORVU6Hr1G076210	2.15973	GTP-binding RHO-like protein
GO:0009987	cellular process	HORVU4Hr1G016880	7.06407	receptor kinase 2
GO:0009987	cellular process	HORVU1Hr1G027770	2.69957	Protein kinase family protein
GO:0009987	cellular process	HORVU5Hr1G048830	2.76601	60S ribosomal protein L15-1
GO:0009987	cellular process	HORVU3Hr1G086050	2.18427	30S ribosomal protein S5
GO:0009987	cellular process	HORVU2Hr1G029350	2.84422	adenylate kinase family protein
GO:0009987	cellular process	HORVU7Hr1G033170	3.36046	Inositol-tetrakisphosphate 1-kinase 5
GO:0009987	cellular process	HORVU4Hr1G038960	3.1895	Alpha-1,4-glucan-protein synthase [UDP-forming]
GO:0009987	cellular process	HORVU4Hr1G089090	3.72677	Chaperone protein DnaK
GO:0009987	cellular process	HORVU6Hr1G041750	3.1927	60S ribosomal protein L6
GO:0009987	cellular process	HORVU5Hr1G081370	2.41712	NEDD8-activating enzyme E1 regulatory subunit
GO:0009987	cellular process	HORVU2Hr1G080340	2.37935	60S ribosomal protein L34
GO:0009987	cellular process	HORVU7Hr1G114660	16.1792	Indole-3-glycerol phosphate synthase
GO:0009987	cellular process	HORVU7Hr1G088580	2.28053	40S ribosomal protein S24-2
GO:0009987	cellular process	HORVU5Hr1G104720	2.68682	30S ribosomal protein S13
GO:0009987	cellular process	HORVU2Hr1G101770	4.47546	Growth-regulating factor 3
GO:0009987	cellular process	HORVU5Hr1G052280	2.22485	60S ribosomal protein L17-1
GO:0009987	cellular process	HORVU5Hr1G092630	2.34034	60S ribosomal protein L5-1
GO:0009987	cellular process	HORVU4Hr1G060740	2.27106	Leucine-rich repeat receptor-like protein kinase family protein
GO:0009987	cellular process	HORVU3Hr1G013910	3.09625	Asparagine synthetase [glutamine-hydrolyzing]
GO:0009987	cellular process	HORVU1Hr1G021700	2.14495	Histidine--tRNA ligase
GO:0009987	cellular process	HORVU7Hr1G080630	2.15076	60S ribosomal protein L22-2
GO:0009987	cellular process	HORVU3Hr1G064200	2.79973	receptor-like protein kinase 4
GO:0009987	cellular process	HORVU0Hr1G017080	4.26293	microtubule-associated proteins 70-2
GO:0009987	cellular process	HORVU3Hr1G050590	4.21845	WRKY DNA-binding protein 50
GO:0009987	cellular process	HORVU7Hr1G034560	2.09799	Choline/ethanolaminephosphotransferase 1
GO:0009987	cellular process	HORVU3Hr1G007590	3.2904	Protein kinase superfamily protein
GO:0009987	cellular process	HORVU4Hr1G079310	3.87996	Cyclin-dependent kinases regulatory subunit 1
GO:0009987	cellular process	HORVU6Hr1G018370	3.05766	calnexin 1
GO:0009987	cellular process	HORVU6Hr1G072030	2.46512	Ribosomal RNA small subunit methyltransferase F
GO:0009987	cellular process	HORVU3Hr1G064950	3.3898	ENTH/ANTH/VHS superfamily protein
GO:0009987	cellular process	HORVU6Hr1G080920	2.04568	Kinesin-related protein 11
GO:0009987	cellular process	HORVU6Hr1G027620	4.69627	tubulin beta chain 2
GO:0009987	cellular process	HORVU7Hr1G109340	12.8501	Protein kinase superfamily protein
GO:0009987	cellular process	HORVU7Hr1G096170	2.26775	Ribosomal RNA large subunit methyltransferase E
GO:0009987	cellular process	HORVU4Hr1G084420	2.27548	60S ribosomal protein L21-2
GO:0009987	cellular process	HORVU0Hr1G038620	2.42332	ATP-dependent DNA helicase 2 subunit KU80
GO:0009987	cellular process	HORVU4Hr1G064790	28.1671	glutamate decarboxylase
GO:0009987	cellular process	HORVU5Hr1G075490	3.1805	Peptidyl-prolyl cis-trans isomerase
GO:0009987	cellular process	HORVU2Hr1G105720	6.04149	U-box domain-containing protein
GO:0009987	cellular process	HORVU6Hr1G014490	2.35318	General transcription factor IIH subunit 3
GO:0009987	cellular process	HORVU4Hr1G037800	3.9401	40S ribosomal protein S29
GO:0009987	cellular process	HORVU6Hr1G063560	2.11481	S-adenosylmethionine synthase 2
GO:0009987	cellular process	HORVU2Hr1G095320	4.714	Heat stress transcription factor B-2a
GO:0009987	cellular process	HORVU5Hr1G125130	2.45483	60 kDa chaperonin 2
GO:0009987	cellular process	HORVU3Hr1G104200	3.43257	Eukaryotic peptide chain release factor subunit 1-2
GO:0009987	cellular process	HORVU3Hr1G030620	3.0107	3-methyl-2-oxobutanoate hydroxymethyltransferase
GO:0009987	cellular process	HORVU4Hr1G078690	5.40527	Ras-related protein Rab-6A
GO:0009987	cellular process	HORVU2Hr1G029890	2.03594	40S ribosomal protein S6
GO:0009987	cellular process	HORVU5Hr1G084140	3.92594	SKP1-like 4
GO:0009987	cellular process	HORVU3Hr1G085760	4.52322	Gamma-glutamyl phosphate reductase
GO:0009987	cellular process	HORVU7Hr1G049370	7.02994	heat shock protein 81-3
GO:0009987	cellular process	HORVU4Hr1G043910	4.9093	Protein disulfide-isomerase
GO:0009987	cellular process	HORVU7Hr1G080310	2.48889	T-complex protein 1 subunit gamma
GO:0009987	cellular process	HORVU4Hr1G019980	2.28527	ribosomal protein 1
GO:0009987	cellular process	HORVU2Hr1G089090	2.03537	60S ribosomal protein L14-1
GO:0009987	cellular process	HORVU6Hr1G063570	2.11481	S-adenosylmethionine synthase 2
GO:0009987	cellular process	HORVU5Hr1G079060	4.8366	RNA polymerase II transcriptional coactivator KIWI
GO:0009987	cellular process	HORVU6Hr1G058560	2.51905	60S ribosomal protein L14-1
GO:0009987	cellular process	HORVU4Hr1G055230	2.07073	40S ribosomal protein S7
GO:0009987	cellular process	HORVU1Hr1G039250	3.53868	cellulose synthase A4

## Sheet: 10 DAS_Seb_hvabi5d_D_GO
GO categories (Biological Processes) that were over-represented in the hvabi5.d mutant compared to 'Sebastian' under control conditions among down-regulated -genes.
GO term	Ontology	Description	Number in input list	Number in BG/Ref	p-value	FDR
GO:0009199	P	ribonucleoside triphosphate metabolic process	16	198	1e-06	0.00017
GO:0009205	P	purine ribonucleoside triphosphate metabolic process	16	198	1e-06	0.00017
GO:0009144	P	purine nucleoside triphosphate metabolic process	16	198	1e-06	0.00017
GO:0009141	P	nucleoside triphosphate metabolic process	16	207	1.8e-06	0.0003
GO:0046128	P	purine ribonucleoside metabolic process	16	214	2.7e-06	0.00045
GO:0042278	P	purine nucleoside metabolic process	16	214	2.7e-06	0.00045
GO:0046034	P	ATP metabolic process	15	192	3.3e-06	0.00056
GO:0009150	P	purine ribonucleotide metabolic process	16	223	4.4e-06	0.00073
GO:0009259	P	ribonucleotide metabolic process	16	225	4.9e-06	0.00082
GO:0009119	P	ribonucleoside metabolic process	16	226	5.2e-06	0.00086
GO:0009167	P	purine ribonucleoside monophosphate metabolic process	15	204	6.6e-06	0.0011
GO:0009126	P	purine nucleoside monophosphate metabolic process	15	204	6.6e-06	0.0011
GO:0006163	P	purine nucleotide metabolic process	16	231	6.7e-06	0.0011
GO:0009161	P	ribonucleoside monophosphate metabolic process	15	206	7.4e-06	0.0012
GO:0009116	P	nucleoside metabolic process	16	234	7.8e-06	0.0013
GO:1901657	P	glycosyl compound metabolic process	16	234	7.8e-06	0.0013
GO:0009123	P	nucleoside monophosphate metabolic process	15	207	7.8e-06	0.0013
GO:0019693	P	ribose phosphate metabolic process	16	236	8.6e-06	0.0014
GO:0072521	P	purine-containing compound metabolic process	16	239	1e-05	0.0017
GO:0019637	P	organophosphate metabolic process	21	397	1.4e-05	0.0023
GO:0009117	P	nucleotide metabolic process	17	280	1.8e-05	0.0029
GO:0006753	P	nucleoside phosphate metabolic process	17	281	1.8e-05	0.0031
GO:0015985	P	energy coupled proton transport, down electrochemical gradient	8	66	4.1e-05	0.0068
GO:0015986	P	ATP synthesis coupled proton transport	8	66	4.1e-05	0.0068
GO:0055086	P	nucleobase-containing small molecule metabolic process	17	310	5.9e-05	0.0098

## Sheet: 10 DAS_Seb_hvabi5d_D_GeneList
GO categories (Biological Processes) that were over-represented in the hvabi5.d mutant compared to 'Sebastian' under control conditions among down-regulated -genes. List of genes.
GO term	Description	Gene ID	FC (abs)	Description IPK
GO:0009199	ribonucleoside triphosphate metabolic process	HORVU0Hr1G034720	2.96259	NAD(P)H-quinone oxidoreductase subunit 2 A, chloroplastic
GO:0009199	ribonucleoside triphosphate metabolic process	HORVU7Hr1G076960	2.96259	NAD(P)H-quinone oxidoreductase subunit 2 A, chloroplastic
GO:0009199	ribonucleoside triphosphate metabolic process	HORVU0Hr1G024480	2.43047	ATP synthase subunit a, chloroplastic
GO:0009199	ribonucleoside triphosphate metabolic process	HORVU0Hr1G033900	2.43047	ATP synthase subunit a, chloroplastic
GO:0009199	ribonucleoside triphosphate metabolic process	HORVU6Hr1G075280	2.62763	ATP synthase delta-subunit gene
GO:0009199	ribonucleoside triphosphate metabolic process	HORVU0Hr1G036790	2.43047	ATP synthase subunit a, chloroplastic
GO:0009199	ribonucleoside triphosphate metabolic process	HORVU6Hr1G049510	2.96259	NAD(P)H-quinone oxidoreductase subunit 2 A, chloroplastic
GO:0009199	ribonucleoside triphosphate metabolic process	HORVU3Hr1G013350	2.02162	triosephosphate isomerase
GO:0009199	ribonucleoside triphosphate metabolic process	HORVU5Hr1G064880	2.96259	NAD(P)H-quinone oxidoreductase subunit 2 A, chloroplastic
GO:0009199	ribonucleoside triphosphate metabolic process	HORVU0Hr1G024810	2.43047	ATP synthase subunit a, chloroplastic
GO:0009199	ribonucleoside triphosphate metabolic process	HORVU2Hr1G110680	7.59231	Molybdenum cofactor biosynthesis protein B
GO:0009199	ribonucleoside triphosphate metabolic process	HORVU7Hr1G090850	2.46947	fructose-bisphosphate aldolase 2
GO:0009199	ribonucleoside triphosphate metabolic process	HORVU0Hr1G028530	2.43047	ATP synthase subunit a, chloroplastic
GO:0009199	ribonucleoside triphosphate metabolic process	HORVU6Hr1G049150	2.43047	ATP synthase subunit a, chloroplastic
GO:0009199	ribonucleoside triphosphate metabolic process	HORVU5Hr1G065650	2.67125	ATP-dependent 6-phosphofructokinase 7
GO:0009199	ribonucleoside triphosphate metabolic process	HORVU0Hr1G032740	2.43047	ATP synthase subunit a, chloroplastic
GO:0009205	purine ribonucleoside triphosphate metabolic process	HORVU0Hr1G034720	2.96259	NAD(P)H-quinone oxidoreductase subunit 2 A, chloroplastic
GO:0009205	purine ribonucleoside triphosphate metabolic process	HORVU7Hr1G076960	2.96259	NAD(P)H-quinone oxidoreductase subunit 2 A, chloroplastic
GO:0009205	purine ribonucleoside triphosphate metabolic process	HORVU0Hr1G024480	2.43047	ATP synthase subunit a, chloroplastic
GO:0009205	purine ribonucleoside triphosphate metabolic process	HORVU0Hr1G033900	2.43047	ATP synthase subunit a, chloroplastic
GO:0009205	purine ribonucleoside triphosphate metabolic process	HORVU6Hr1G075280	2.62763	ATP synthase delta-subunit gene
GO:0009205	purine ribonucleoside triphosphate metabolic process	HORVU0Hr1G036790	2.43047	ATP synthase subunit a, chloroplastic
GO:0009205	purine ribonucleoside triphosphate metabolic process	HORVU6Hr1G049510	2.96259	NAD(P)H-quinone oxidoreductase subunit 2 A, chloroplastic
GO:0009205	purine ribonucleoside triphosphate metabolic process	HORVU3Hr1G013350	2.02162	triosephosphate isomerase
GO:0009205	purine ribonucleoside triphosphate metabolic process	HORVU5Hr1G064880	2.96259	NAD(P)H-quinone oxidoreductase subunit 2 A, chloroplastic
GO:0009205	purine ribonucleoside triphosphate metabolic process	HORVU0Hr1G024810	2.43047	ATP synthase subunit a, chloroplastic
GO:0009205	purine ribonucleoside triphosphate metabolic process	HORVU2Hr1G110680	7.59231	Molybdenum cofactor biosynthesis protein B
GO:0009205	purine ribonucleoside triphosphate metabolic process	HORVU7Hr1G090850	2.46947	fructose-bisphosphate aldolase 2
GO:0009205	purine ribonucleoside triphosphate metabolic process	HORVU0Hr1G028530	2.43047	ATP synthase subunit a, chloroplastic
GO:0009205	purine ribonucleoside triphosphate metabolic process	HORVU6Hr1G049150	2.43047	ATP synthase subunit a, chloroplastic
GO:0009205	purine ribonucleoside triphosphate metabolic process	HORVU5Hr1G065650	2.67125	ATP-dependent 6-phosphofructokinase 7
GO:0009205	purine ribonucleoside triphosphate metabolic process	HORVU0Hr1G032740	2.43047	ATP synthase subunit a, chloroplastic
GO:0009144	purine nucleoside triphosphate metabolic process	HORVU0Hr1G034720	2.96259	NAD(P)H-quinone oxidoreductase subunit 2 A, chloroplastic
GO:0009144	purine nucleoside triphosphate metabolic process	HORVU7Hr1G076960	2.96259	NAD(P)H-quinone oxidoreductase subunit 2 A, chloroplastic
GO:0009144	purine nucleoside triphosphate metabolic process	HORVU0Hr1G024480	2.43047	ATP synthase subunit a, chloroplastic
GO:0009144	purine nucleoside triphosphate metabolic process	HORVU0Hr1G033900	2.43047	ATP synthase subunit a, chloroplastic
GO:0009144	purine nucleoside triphosphate metabolic process	HORVU6Hr1G075280	2.62763	ATP synthase delta-subunit gene
GO:0009144	purine nucleoside triphosphate metabolic process	HORVU0Hr1G036790	2.43047	ATP synthase subunit a, chloroplastic
GO:0009144	purine nucleoside triphosphate metabolic process	HORVU6Hr1G049510	2.96259	NAD(P)H-quinone oxidoreductase subunit 2 A, chloroplastic
GO:0009144	purine nucleoside triphosphate metabolic process	HORVU3Hr1G013350	2.02162	triosephosphate isomerase
GO:0009144	purine nucleoside triphosphate metabolic process	HORVU5Hr1G064880	2.96259	NAD(P)H-quinone oxidoreductase subunit 2 A, chloroplastic
GO:0009144	purine nucleoside triphosphate metabolic process	HORVU0Hr1G024810	2.43047	ATP synthase subunit a, chloroplastic
GO:0009144	purine nucleoside triphosphate metabolic process	HORVU2Hr1G110680	7.59231	Molybdenum cofactor biosynthesis protein B
GO:0009144	purine nucleoside triphosphate metabolic process	HORVU7Hr1G090850	2.46947	fructose-bisphosphate aldolase 2
GO:0009144	purine nucleoside triphosphate metabolic process	HORVU0Hr1G028530	2.43047	ATP synthase subunit a, chloroplastic
GO:0009144	purine nucleoside triphosphate metabolic process	HORVU6Hr1G049150	2.43047	ATP synthase subunit a, chloroplastic
GO:0009144	purine nucleoside triphosphate metabolic process	HORVU5Hr1G065650	2.67125	ATP-dependent 6-phosphofructokinase 7
GO:0009144	purine nucleoside triphosphate metabolic process	HORVU0Hr1G032740	2.43047	ATP synthase subunit a, chloroplastic
GO:0009141	nucleoside triphosphate metabolic process	HORVU0Hr1G034720	2.96259	NAD(P)H-quinone oxidoreductase subunit 2 A, chloroplastic
GO:0009141	nucleoside triphosphate metabolic process	HORVU7Hr1G076960	2.96259	NAD(P)H-quinone oxidoreductase subunit 2 A, chloroplastic
GO:0009141	nucleoside triphosphate metabolic process	HORVU0Hr1G024480	2.43047	ATP synthase subunit a, chloroplastic
GO:0009141	nucleoside triphosphate metabolic process	HORVU0Hr1G033900	2.43047	ATP synthase subunit a, chloroplastic
GO:0009141	nucleoside triphosphate metabolic process	HORVU6Hr1G075280	2.62763	ATP synthase delta-subunit gene
GO:0009141	nucleoside triphosphate metabolic process	HORVU0Hr1G036790	2.43047	ATP synthase subunit a, chloroplastic
GO:0009141	nucleoside triphosphate metabolic process	HORVU6Hr1G049510	2.96259	NAD(P)H-quinone oxidoreductase subunit 2 A, chloroplastic
GO:0009141	nucleoside triphosphate metabolic process	HORVU3Hr1G013350	2.02162	triosephosphate isomerase
GO:0009141	nucleoside triphosphate metabolic process	HORVU5Hr1G064880	2.96259	NAD(P)H-quinone oxidoreductase subunit 2 A, chloroplastic
GO:0009141	nucleoside triphosphate metabolic process	HORVU0Hr1G024810	2.43047	ATP synthase subunit a, chloroplastic
GO:0009141	nucleoside triphosphate metabolic process	HORVU2Hr1G110680	7.59231	Molybdenum cofactor biosynthesis protein B
GO:0009141	nucleoside triphosphate metabolic process	HORVU7Hr1G090850	2.46947	fructose-bisphosphate aldolase 2
GO:0009141	nucleoside triphosphate metabolic process	HORVU0Hr1G028530	2.43047	ATP synthase subunit a, chloroplastic
GO:0009141	nucleoside triphosphate metabolic process	HORVU6Hr1G049150	2.43047	ATP synthase subunit a, chloroplastic
GO:0009141	nucleoside triphosphate metabolic process	HORVU5Hr1G065650	2.67125	ATP-dependent 6-phosphofructokinase 7
GO:0009141	nucleoside triphosphate metabolic process	HORVU0Hr1G032740	2.43047	ATP synthase subunit a, chloroplastic
GO:0046128	purine ribonucleoside metabolic process	HORVU0Hr1G034720	2.96259	NAD(P)H-quinone oxidoreductase subunit 2 A, chloroplastic
GO:0046128	purine ribonucleoside metabolic process	HORVU7Hr1G076960	2.96259	NAD(P)H-quinone oxidoreductase subunit 2 A, chloroplastic
GO:0046128	purine ribonucleoside metabolic process	HORVU0Hr1G024480	2.43047	ATP synthase subunit a, chloroplastic
GO:0046128	purine ribonucleoside metabolic process	HORVU0Hr1G033900	2.43047	ATP synthase subunit a, chloroplastic
GO:0046128	purine ribonucleoside metabolic process	HORVU6Hr1G075280	2.62763	ATP synthase delta-subunit gene
GO:0046128	purine ribonucleoside metabolic process	HORVU0Hr1G036790	2.43047	ATP synthase subunit a, chloroplastic
GO:0046128	purine ribonucleoside metabolic process	HORVU6Hr1G049510	2.96259	NAD(P)H-quinone oxidoreductase subunit 2 A, chloroplastic
GO:0046128	purine ribonucleoside metabolic process	HORVU3Hr1G013350	2.02162	triosephosphate isomerase
GO:0046128	purine ribonucleoside metabolic process	HORVU5Hr1G064880	2.96259	NAD(P)H-quinone oxidoreductase subunit 2 A, chloroplastic
GO:0046128	purine ribonucleoside metabolic process	HORVU0Hr1G024810	2.43047	ATP synthase subunit a, chloroplastic
GO:0046128	purine ribonucleoside metabolic process	HORVU2Hr1G110680	7.59231	Molybdenum cofactor biosynthesis protein B
GO:0046128	purine ribonucleoside metabolic process	HORVU7Hr1G090850	2.46947	fructose-bisphosphate aldolase 2
GO:0046128	purine ribonucleoside metabolic process	HORVU0Hr1G028530	2.43047	ATP synthase subunit a, chloroplastic
GO:0046128	purine ribonucleoside metabolic process	HORVU6Hr1G049150	2.43047	ATP synthase subunit a, chloroplastic
GO:0046128	purine ribonucleoside metabolic process	HORVU5Hr1G065650	2.67125	ATP-dependent 6-phosphofructokinase 7
GO:0046128	purine ribonucleoside metabolic process	HORVU0Hr1G032740	2.43047	ATP synthase subunit a, chloroplastic
GO:0042278	purine nucleoside metabolic process	HORVU0Hr1G034720	2.96259	NAD(P)H-quinone oxidoreductase subunit 2 A, chloroplastic
GO:0042278	purine nucleoside metabolic process	HORVU7Hr1G076960	2.96259	NAD(P)H-quinone oxidoreductase subunit 2 A, chloroplastic
GO:0042278	purine nucleoside metabolic process	HORVU0Hr1G024480	2.43047	ATP synthase subunit a, chloroplastic
GO:0042278	purine nucleoside metabolic process	HORVU0Hr1G033900	2.43047	ATP synthase subunit a, chloroplastic
GO:0042278	purine nucleoside metabolic process	HORVU6Hr1G075280	2.62763	ATP synthase delta-subunit gene
GO:0042278	purine nucleoside metabolic process	HORVU0Hr1G036790	2.43047	ATP synthase subunit a, chloroplastic
GO:0042278	purine nucleoside metabolic process	HORVU6Hr1G049510	2.96259	NAD(P)H-quinone oxidoreductase subunit 2 A, chloroplastic
GO:0042278	purine nucleoside metabolic process	HORVU3Hr1G013350	2.02162	triosephosphate isomerase
GO:0042278	purine nucleoside metabolic process	HORVU5Hr1G064880	2.96259	NAD(P)H-quinone oxidoreductase subunit 2 A, chloroplastic
GO:0042278	purine nucleoside metabolic process	HORVU0Hr1G024810	2.43047	ATP synthase subunit a, chloroplastic
GO:0042278	purine nucleoside metabolic process	HORVU2Hr1G110680	7.59231	Molybdenum cofactor biosynthesis protein B
GO:0042278	purine nucleoside metabolic process	HORVU7Hr1G090850	2.46947	fructose-bisphosphate aldolase 2
GO:0042278	purine nucleoside metabolic process	HORVU0Hr1G028530	2.43047	ATP synthase subunit a, chloroplastic
GO:0042278	purine nucleoside metabolic process	HORVU6Hr1G049150	2.43047	ATP synthase subunit a, chloroplastic
GO:0042278	purine nucleoside metabolic process	HORVU5Hr1G065650	2.67125	ATP-dependent 6-phosphofructokinase 7
GO:0042278	purine nucleoside metabolic process	HORVU0Hr1G032740	2.43047	ATP synthase subunit a, chloroplastic
GO:0046034	ATP metabolic process	HORVU0Hr1G034720	2.96259	NAD(P)H-quinone oxidoreductase subunit 2 A, chloroplastic
GO:0046034	ATP metabolic process	HORVU7Hr1G076960	2.96259	NAD(P)H-quinone oxidoreductase subunit 2 A, chloroplastic
GO:0046034	ATP metabolic process	HORVU0Hr1G024480	2.43047	ATP synthase subunit a, chloroplastic
GO:0046034	ATP metabolic process	HORVU0Hr1G033900	2.43047	ATP synthase subunit a, chloroplastic
GO:0046034	ATP metabolic process	HORVU6Hr1G075280	2.62763	ATP synthase delta-subunit gene
GO:0046034	ATP metabolic process	HORVU0Hr1G036790	2.43047	ATP synthase subunit a, chloroplastic
GO:0046034	ATP metabolic process	HORVU6Hr1G049510	2.96259	NAD(P)H-quinone oxidoreductase subunit 2 A, chloroplastic
GO:0046034	ATP metabolic process	HORVU3Hr1G013350	2.02162	triosephosphate isomerase
GO:0046034	ATP metabolic process	HORVU5Hr1G064880	2.96259	NAD(P)H-quinone oxidoreductase subunit 2 A, chloroplastic
GO:0046034	ATP metabolic process	HORVU0Hr1G024810	2.43047	ATP synthase subunit a, chloroplastic
GO:0046034	ATP metabolic process	HORVU7Hr1G090850	2.46947	fructose-bisphosphate aldolase 2
GO:0046034	ATP metabolic process	HORVU0Hr1G028530	2.43047	ATP synthase subunit a, chloroplastic
GO:0046034	ATP metabolic process	HORVU6Hr1G049150	2.43047	ATP synthase subunit a, chloroplastic
GO:0046034	ATP metabolic process	HORVU5Hr1G065650	2.67125	ATP-dependent 6-phosphofructokinase 7
GO:0046034	ATP metabolic process	HORVU0Hr1G032740	2.43047	ATP synthase subunit a, chloroplastic
GO:0009150	purine ribonucleotide metabolic process	HORVU0Hr1G034720	2.96259	NAD(P)H-quinone oxidoreductase subunit 2 A, chloroplastic
GO:0009150	purine ribonucleotide metabolic process	HORVU7Hr1G076960	2.96259	NAD(P)H-quinone oxidoreductase subunit 2 A, chloroplastic
GO:0009150	purine ribonucleotide metabolic process	HORVU0Hr1G024480	2.43047	ATP synthase subunit a, chloroplastic
GO:0009150	purine ribonucleotide metabolic process	HORVU0Hr1G033900	2.43047	ATP synthase subunit a, chloroplastic
GO:0009150	purine ribonucleotide metabolic process	HORVU6Hr1G075280	2.62763	ATP synthase delta-subunit gene
GO:0009150	purine ribonucleotide metabolic process	HORVU0Hr1G036790	2.43047	ATP synthase subunit a, chloroplastic
GO:0009150	purine ribonucleotide metabolic process	HORVU6Hr1G049510	2.96259	NAD(P)H-quinone oxidoreductase subunit 2 A, chloroplastic
GO:0009150	purine ribonucleotide metabolic process	HORVU3Hr1G013350	2.02162	triosephosphate isomerase
GO:0009150	purine ribonucleotide metabolic process	HORVU5Hr1G064880	2.96259	NAD(P)H-quinone oxidoreductase subunit 2 A, chloroplastic
GO:0009150	purine ribonucleotide metabolic process	HORVU0Hr1G024810	2.43047	ATP synthase subunit a, chloroplastic
GO:0009150	purine ribonucleotide metabolic process	HORVU2Hr1G110680	7.59231	Molybdenum cofactor biosynthesis protein B
GO:0009150	purine ribonucleotide metabolic process	HORVU7Hr1G090850	2.46947	fructose-bisphosphate aldolase 2
GO:0009150	purine ribonucleotide metabolic process	HORVU0Hr1G028530	2.43047	ATP synthase subunit a, chloroplastic
GO:0009150	purine ribonucleotide metabolic process	HORVU6Hr1G049150	2.43047	ATP synthase subunit a, chloroplastic
GO:0009150	purine ribonucleotide metabolic process	HORVU5Hr1G065650	2.67125	ATP-dependent 6-phosphofructokinase 7
GO:0009150	purine ribonucleotide metabolic process	HORVU0Hr1G032740	2.43047	ATP synthase subunit a, chloroplastic
GO:0009259	ribonucleotide metabolic process	HORVU0Hr1G034720	2.96259	NAD(P)H-quinone oxidoreductase subunit 2 A, chloroplastic
GO:0009259	ribonucleotide metabolic process	HORVU7Hr1G076960	2.96259	NAD(P)H-quinone oxidoreductase subunit 2 A, chloroplastic
GO:0009259	ribonucleotide metabolic process	HORVU0Hr1G024480	2.43047	ATP synthase subunit a, chloroplastic
GO:0009259	ribonucleotide metabolic process	HORVU0Hr1G033900	2.43047	ATP synthase subunit a, chloroplastic
GO:0009259	ribonucleotide metabolic process	HORVU6Hr1G075280	2.62763	ATP synthase delta-subunit gene
GO:0009259	ribonucleotide metabolic process	HORVU0Hr1G036790	2.43047	ATP synthase subunit a, chloroplastic
GO:0009259	ribonucleotide metabolic process	HORVU6Hr1G049510	2.96259	NAD(P)H-quinone oxidoreductase subunit 2 A, chloroplastic
GO:0009259	ribonucleotide metabolic process	HORVU3Hr1G013350	2.02162	triosephosphate isomerase
GO:0009259	ribonucleotide metabolic process	HORVU5Hr1G064880	2.96259	NAD(P)H-quinone oxidoreductase subunit 2 A, chloroplastic
GO:0009259	ribonucleotide metabolic process	HORVU0Hr1G024810	2.43047	ATP synthase subunit a, chloroplastic
GO:0009259	ribonucleotide metabolic process	HORVU2Hr1G110680	7.59231	Molybdenum cofactor biosynthesis protein B
GO:0009259	ribonucleotide metabolic process	HORVU7Hr1G090850	2.46947	fructose-bisphosphate aldolase 2
GO:0009259	ribonucleotide metabolic process	HORVU0Hr1G028530	2.43047	ATP synthase subunit a, chloroplastic
GO:0009259	ribonucleotide metabolic process	HORVU6Hr1G049150	2.43047	ATP synthase subunit a, chloroplastic
GO:0009259	ribonucleotide metabolic process	HORVU5Hr1G065650	2.67125	ATP-dependent 6-phosphofructokinase 7
GO:0009259	ribonucleotide metabolic process	HORVU0Hr1G032740	2.43047	ATP synthase subunit a, chloroplastic
GO:0009119	ribonucleoside metabolic process	HORVU0Hr1G034720	2.96259	NAD(P)H-quinone oxidoreductase subunit 2 A, chloroplastic
GO:0009119	ribonucleoside metabolic process	HORVU7Hr1G076960	2.96259	NAD(P)H-quinone oxidoreductase subunit 2 A, chloroplastic
GO:0009119	ribonucleoside metabolic process	HORVU0Hr1G024480	2.43047	ATP synthase subunit a, chloroplastic
GO:0009119	ribonucleoside metabolic process	HORVU0Hr1G033900	2.43047	ATP synthase subunit a, chloroplastic
GO:0009119	ribonucleoside metabolic process	HORVU6Hr1G075280	2.62763	ATP synthase delta-subunit gene
GO:0009119	ribonucleoside metabolic process	HORVU0Hr1G036790	2.43047	ATP synthase subunit a, chloroplastic
GO:0009119	ribonucleoside metabolic process	HORVU6Hr1G049510	2.96259	NAD(P)H-quinone oxidoreductase subunit 2 A, chloroplastic
GO:0009119	ribonucleoside metabolic process	HORVU3Hr1G013350	2.02162	triosephosphate isomerase
GO:0009119	ribonucleoside metabolic process	HORVU5Hr1G064880	2.96259	NAD(P)H-quinone oxidoreductase subunit 2 A, chloroplastic
GO:0009119	ribonucleoside metabolic process	HORVU0Hr1G024810	2.43047	ATP synthase subunit a, chloroplastic
GO:0009119	ribonucleoside metabolic process	HORVU2Hr1G110680	7.59231	Molybdenum cofactor biosynthesis protein B
GO:0009119	ribonucleoside metabolic process	HORVU7Hr1G090850	2.46947	fructose-bisphosphate aldolase 2
GO:0009119	ribonucleoside metabolic process	HORVU0Hr1G028530	2.43047	ATP synthase subunit a, chloroplastic
GO:0009119	ribonucleoside metabolic process	HORVU6Hr1G049150	2.43047	ATP synthase subunit a, chloroplastic
GO:0009119	ribonucleoside metabolic process	HORVU5Hr1G065650	2.67125	ATP-dependent 6-phosphofructokinase 7
GO:0009119	ribonucleoside metabolic process	HORVU0Hr1G032740	2.43047	ATP synthase subunit a, chloroplastic
GO:0009167	purine ribonucleoside monophosphate metabolic process	HORVU0Hr1G034720	2.96259	NAD(P)H-quinone oxidoreductase subunit 2 A, chloroplastic
GO:0009167	purine ribonucleoside monophosphate metabolic process	HORVU7Hr1G076960	2.96259	NAD(P)H-quinone oxidoreductase subunit 2 A, chloroplastic
GO:0009167	purine ribonucleoside monophosphate metabolic process	HORVU0Hr1G024480	2.43047	ATP synthase subunit a, chloroplastic
GO:0009167	purine ribonucleoside monophosphate metabolic process	HORVU0Hr1G033900	2.43047	ATP synthase subunit a, chloroplastic
GO:0009167	purine ribonucleoside monophosphate metabolic process	HORVU6Hr1G075280	2.62763	ATP synthase delta-subunit gene
GO:0009167	purine ribonucleoside monophosphate metabolic process	HORVU0Hr1G036790	2.43047	ATP synthase subunit a, chloroplastic
GO:0009167	purine ribonucleoside monophosphate metabolic process	HORVU6Hr1G049510	2.96259	NAD(P)H-quinone oxidoreductase subunit 2 A, chloroplastic
GO:0009167	purine ribonucleoside monophosphate metabolic process	HORVU3Hr1G013350	2.02162	triosephosphate isomerase
GO:0009167	purine ribonucleoside monophosphate metabolic process	HORVU5Hr1G064880	2.96259	NAD(P)H-quinone oxidoreductase subunit 2 A, chloroplastic
GO:0009167	purine ribonucleoside monophosphate metabolic process	HORVU0Hr1G024810	2.43047	ATP synthase subunit a, chloroplastic
GO:0009167	purine ribonucleoside monophosphate metabolic process	HORVU7Hr1G090850	2.46947	fructose-bisphosphate aldolase 2
GO:0009167	purine ribonucleoside monophosphate metabolic process	HORVU0Hr1G028530	2.43047	ATP synthase subunit a, chloroplastic
GO:0009167	purine ribonucleoside monophosphate metabolic process	HORVU6Hr1G049150	2.43047	ATP synthase subunit a, chloroplastic
GO:0009167	purine ribonucleoside monophosphate metabolic process	HORVU5Hr1G065650	2.67125	ATP-dependent 6-phosphofructokinase 7
GO:0009167	purine ribonucleoside monophosphate metabolic process	HORVU0Hr1G032740	2.43047	ATP synthase subunit a, chloroplastic
GO:0009126	purine nucleoside monophosphate metabolic process	HORVU0Hr1G034720	2.96259	NAD(P)H-quinone oxidoreductase subunit 2 A, chloroplastic
GO:0009126	purine nucleoside monophosphate metabolic process	HORVU7Hr1G076960	2.96259	NAD(P)H-quinone oxidoreductase subunit 2 A, chloroplastic
GO:0009126	purine nucleoside monophosphate metabolic process	HORVU0Hr1G024480	2.43047	ATP synthase subunit a, chloroplastic
GO:0009126	purine nucleoside monophosphate metabolic process	HORVU0Hr1G033900	2.43047	ATP synthase subunit a, chloroplastic
GO:0009126	purine nucleoside monophosphate metabolic process	HORVU6Hr1G075280	2.62763	ATP synthase delta-subunit gene
GO:0009126	purine nucleoside monophosphate metabolic process	HORVU0Hr1G036790	2.43047	ATP synthase subunit a, chloroplastic
GO:0009126	purine nucleoside monophosphate metabolic process	HORVU6Hr1G049510	2.96259	NAD(P)H-quinone oxidoreductase subunit 2 A, chloroplastic
GO:0009126	purine nucleoside monophosphate metabolic process	HORVU3Hr1G013350	2.02162	triosephosphate isomerase
GO:0009126	purine nucleoside monophosphate metabolic process	HORVU5Hr1G064880	2.96259	NAD(P)H-quinone oxidoreductase subunit 2 A, chloroplastic
GO:0009126	purine nucleoside monophosphate metabolic process	HORVU0Hr1G024810	2.43047	ATP synthase subunit a, chloroplastic
GO:0009126	purine nucleoside monophosphate metabolic process	HORVU7Hr1G090850	2.46947	fructose-bisphosphate aldolase 2
GO:0009126	purine nucleoside monophosphate metabolic process	HORVU0Hr1G028530	2.43047	ATP synthase subunit a, chloroplastic
GO:0009126	purine nucleoside monophosphate metabolic process	HORVU6Hr1G049150	2.43047	ATP synthase subunit a, chloroplastic
GO:0009126	purine nucleoside monophosphate metabolic process	HORVU5Hr1G065650	2.67125	ATP-dependent 6-phosphofructokinase 7
GO:0009126	purine nucleoside monophosphate metabolic process	HORVU0Hr1G032740	2.43047	ATP synthase subunit a, chloroplastic
GO:0006163	purine nucleotide metabolic process	HORVU0Hr1G034720	2.96259	NAD(P)H-quinone oxidoreductase subunit 2 A, chloroplastic
GO:0006163	purine nucleotide metabolic process	HORVU7Hr1G076960	2.96259	NAD(P)H-quinone oxidoreductase subunit 2 A, chloroplastic
GO:0006163	purine nucleotide metabolic process	HORVU0Hr1G024480	2.43047	ATP synthase subunit a, chloroplastic
GO:0006163	purine nucleotide metabolic process	HORVU0Hr1G033900	2.43047	ATP synthase subunit a, chloroplastic
GO:0006163	purine nucleotide metabolic process	HORVU6Hr1G075280	2.62763	ATP synthase delta-subunit gene
GO:0006163	purine nucleotide metabolic process	HORVU0Hr1G036790	2.43047	ATP synthase subunit a, chloroplastic
GO:0006163	purine nucleotide metabolic process	HORVU6Hr1G049510	2.96259	NAD(P)H-quinone oxidoreductase subunit 2 A, chloroplastic
GO:0006163	purine nucleotide metabolic process	HORVU3Hr1G013350	2.02162	triosephosphate isomerase
GO:0006163	purine nucleotide metabolic process	HORVU5Hr1G064880	2.96259	NAD(P)H-quinone oxidoreductase subunit 2 A, chloroplastic
GO:0006163	purine nucleotide metabolic process	HORVU0Hr1G024810	2.43047	ATP synthase subunit a, chloroplastic
GO:0006163	purine nucleotide metabolic process	HORVU2Hr1G110680	7.59231	Molybdenum cofactor biosynthesis protein B
GO:0006163	purine nucleotide metabolic process	HORVU7Hr1G090850	2.46947	fructose-bisphosphate aldolase 2
GO:0006163	purine nucleotide metabolic process	HORVU0Hr1G028530	2.43047	ATP synthase subunit a, chloroplastic
GO:0006163	purine nucleotide metabolic process	HORVU6Hr1G049150	2.43047	ATP synthase subunit a, chloroplastic
GO:0006163	purine nucleotide metabolic process	HORVU5Hr1G065650	2.67125	ATP-dependent 6-phosphofructokinase 7
GO:0006163	purine nucleotide metabolic process	HORVU0Hr1G032740	2.43047	ATP synthase subunit a, chloroplastic
GO:0009161	ribonucleoside monophosphate metabolic process	HORVU0Hr1G034720	2.96259	NAD(P)H-quinone oxidoreductase subunit 2 A, chloroplastic
GO:0009161	ribonucleoside monophosphate metabolic process	HORVU7Hr1G076960	2.96259	NAD(P)H-quinone oxidoreductase subunit 2 A, chloroplastic
GO:0009161	ribonucleoside monophosphate metabolic process	HORVU0Hr1G024480	2.43047	ATP synthase subunit a, chloroplastic
GO:0009161	ribonucleoside monophosphate metabolic process	HORVU0Hr1G033900	2.43047	ATP synthase subunit a, chloroplastic
GO:0009161	ribonucleoside monophosphate metabolic process	HORVU6Hr1G075280	2.62763	ATP synthase delta-subunit gene
GO:0009161	ribonucleoside monophosphate metabolic process	HORVU0Hr1G036790	2.43047	ATP synthase subunit a, chloroplastic
GO:0009161	ribonucleoside monophosphate metabolic process	HORVU6Hr1G049510	2.96259	NAD(P)H-quinone oxidoreductase subunit 2 A, chloroplastic
GO:0009161	ribonucleoside monophosphate metabolic process	HORVU3Hr1G013350	2.02162	triosephosphate isomerase
GO:0009161	ribonucleoside monophosphate metabolic process	HORVU5Hr1G064880	2.96259	NAD(P)H-quinone oxidoreductase subunit 2 A, chloroplastic
GO:0009161	ribonucleoside monophosphate metabolic process	HORVU0Hr1G024810	2.43047	ATP synthase subunit a, chloroplastic
GO:0009161	ribonucleoside monophosphate metabolic process	HORVU7Hr1G090850	2.46947	fructose-bisphosphate aldolase 2
GO:0009161	ribonucleoside monophosphate metabolic process	HORVU0Hr1G028530	2.43047	ATP synthase subunit a, chloroplastic
GO:0009161	ribonucleoside monophosphate metabolic process	HORVU6Hr1G049150	2.43047	ATP synthase subunit a, chloroplastic
GO:0009161	ribonucleoside monophosphate metabolic process	HORVU5Hr1G065650	2.67125	ATP-dependent 6-phosphofructokinase 7
GO:0009161	ribonucleoside monophosphate metabolic process	HORVU0Hr1G032740	2.43047	ATP synthase subunit a, chloroplastic
GO:0009116	nucleoside metabolic process	HORVU0Hr1G034720	2.96259	NAD(P)H-quinone oxidoreductase subunit 2 A, chloroplastic
GO:0009116	nucleoside metabolic process	HORVU7Hr1G076960	2.96259	NAD(P)H-quinone oxidoreductase subunit 2 A, chloroplastic
GO:0009116	nucleoside metabolic process	HORVU0Hr1G024480	2.43047	ATP synthase subunit a, chloroplastic
GO:0009116	nucleoside metabolic process	HORVU0Hr1G033900	2.43047	ATP synthase subunit a, chloroplastic
GO:0009116	nucleoside metabolic process	HORVU6Hr1G075280	2.62763	ATP synthase delta-subunit gene
GO:0009116	nucleoside metabolic process	HORVU0Hr1G036790	2.43047	ATP synthase subunit a, chloroplastic
GO:0009116	nucleoside metabolic process	HORVU6Hr1G049510	2.96259	NAD(P)H-quinone oxidoreductase subunit 2 A, chloroplastic
GO:0009116	nucleoside metabolic process	HORVU3Hr1G013350	2.02162	triosephosphate isomerase
GO:0009116	nucleoside metabolic process	HORVU5Hr1G064880	2.96259	NAD(P)H-quinone oxidoreductase subunit 2 A, chloroplastic
GO:0009116	nucleoside metabolic process	HORVU0Hr1G024810	2.43047	ATP synthase subunit a, chloroplastic
GO:0009116	nucleoside metabolic process	HORVU2Hr1G110680	7.59231	Molybdenum cofactor biosynthesis protein B
GO:0009116	nucleoside metabolic process	HORVU7Hr1G090850	2.46947	fructose-bisphosphate aldolase 2
GO:0009116	nucleoside metabolic process	HORVU0Hr1G028530	2.43047	ATP synthase subunit a, chloroplastic
GO:0009116	nucleoside metabolic process	HORVU6Hr1G049150	2.43047	ATP synthase subunit a, chloroplastic
GO:0009116	nucleoside metabolic process	HORVU5Hr1G065650	2.67125	ATP-dependent 6-phosphofructokinase 7
GO:0009116	nucleoside metabolic process	HORVU0Hr1G032740	2.43047	ATP synthase subunit a, chloroplastic
GO:1901657	glycosyl compound metabolic process	HORVU0Hr1G034720	2.96259	NAD(P)H-quinone oxidoreductase subunit 2 A, chloroplastic
GO:1901657	glycosyl compound metabolic process	HORVU7Hr1G076960	2.96259	NAD(P)H-quinone oxidoreductase subunit 2 A, chloroplastic
GO:1901657	glycosyl compound metabolic process	HORVU0Hr1G024480	2.43047	ATP synthase subunit a, chloroplastic
GO:1901657	glycosyl compound metabolic process	HORVU0Hr1G033900	2.43047	ATP synthase subunit a, chloroplastic
GO:1901657	glycosyl compound metabolic process	HORVU6Hr1G075280	2.62763	ATP synthase delta-subunit gene
GO:1901657	glycosyl compound metabolic process	HORVU0Hr1G036790	2.43047	ATP synthase subunit a, chloroplastic
GO:1901657	glycosyl compound metabolic process	HORVU6Hr1G049510	2.96259	NAD(P)H-quinone oxidoreductase subunit 2 A, chloroplastic
GO:1901657	glycosyl compound metabolic process	HORVU3Hr1G013350	2.02162	triosephosphate isomerase
GO:1901657	glycosyl compound metabolic process	HORVU5Hr1G064880	2.96259	NAD(P)H-quinone oxidoreductase subunit 2 A, chloroplastic
GO:1901657	glycosyl compound metabolic process	HORVU0Hr1G024810	2.43047	ATP synthase subunit a, chloroplastic
GO:1901657	glycosyl compound metabolic process	HORVU2Hr1G110680	7.59231	Molybdenum cofactor biosynthesis protein B
GO:1901657	glycosyl compound metabolic process	HORVU7Hr1G090850	2.46947	fructose-bisphosphate aldolase 2
GO:1901657	glycosyl compound metabolic process	HORVU0Hr1G028530	2.43047	ATP synthase subunit a, chloroplastic
GO:1901657	glycosyl compound metabolic process	HORVU6Hr1G049150	2.43047	ATP synthase subunit a, chloroplastic
GO:1901657	glycosyl compound metabolic process	HORVU5Hr1G065650	2.67125	ATP-dependent 6-phosphofructokinase 7
GO:1901657	glycosyl compound metabolic process	HORVU0Hr1G032740	2.43047	ATP synthase subunit a, chloroplastic
GO:0009123	nucleoside monophosphate metabolic process	HORVU0Hr1G034720	2.96259	NAD(P)H-quinone oxidoreductase subunit 2 A, chloroplastic
GO:0009123	nucleoside monophosphate metabolic process	HORVU7Hr1G076960	2.96259	NAD(P)H-quinone oxidoreductase subunit 2 A, chloroplastic
GO:0009123	nucleoside monophosphate metabolic process	HORVU0Hr1G024480	2.43047	ATP synthase subunit a, chloroplastic
GO:0009123	nucleoside monophosphate metabolic process	HORVU0Hr1G033900	2.43047	ATP synthase subunit a, chloroplastic
GO:0009123	nucleoside monophosphate metabolic process	HORVU6Hr1G075280	2.62763	ATP synthase delta-subunit gene
GO:0009123	nucleoside monophosphate metabolic process	HORVU0Hr1G036790	2.43047	ATP synthase subunit a, chloroplastic
GO:0009123	nucleoside monophosphate metabolic process	HORVU6Hr1G049510	2.96259	NAD(P)H-quinone oxidoreductase subunit 2 A, chloroplastic
GO:0009123	nucleoside monophosphate metabolic process	HORVU3Hr1G013350	2.02162	triosephosphate isomerase
GO:0009123	nucleoside monophosphate metabolic process	HORVU5Hr1G064880	2.96259	NAD(P)H-quinone oxidoreductase subunit 2 A, chloroplastic
GO:0009123	nucleoside monophosphate metabolic process	HORVU0Hr1G024810	2.43047	ATP synthase subunit a, chloroplastic
GO:0009123	nucleoside monophosphate metabolic process	HORVU7Hr1G090850	2.46947	fructose-bisphosphate aldolase 2
GO:0009123	nucleoside monophosphate metabolic process	HORVU0Hr1G028530	2.43047	ATP synthase subunit a, chloroplastic
GO:0009123	nucleoside monophosphate metabolic process	HORVU6Hr1G049150	2.43047	ATP synthase subunit a, chloroplastic
GO:0009123	nucleoside monophosphate metabolic process	HORVU5Hr1G065650	2.67125	ATP-dependent 6-phosphofructokinase 7
GO:0009123	nucleoside monophosphate metabolic process	HORVU0Hr1G032740	2.43047	ATP synthase subunit a, chloroplastic
GO:0019693	ribose phosphate metabolic process	HORVU0Hr1G034720	2.96259	NAD(P)H-quinone oxidoreductase subunit 2 A, chloroplastic
GO:0019693	ribose phosphate metabolic process	HORVU7Hr1G076960	2.96259	NAD(P)H-quinone oxidoreductase subunit 2 A, chloroplastic
GO:0019693	ribose phosphate metabolic process	HORVU0Hr1G024480	2.43047	ATP synthase subunit a, chloroplastic
GO:0019693	ribose phosphate metabolic process	HORVU0Hr1G033900	2.43047	ATP synthase subunit a, chloroplastic
GO:0019693	ribose phosphate metabolic process	HORVU6Hr1G075280	2.62763	ATP synthase delta-subunit gene
GO:0019693	ribose phosphate metabolic process	HORVU0Hr1G036790	2.43047	ATP synthase subunit a, chloroplastic
GO:0019693	ribose phosphate metabolic process	HORVU6Hr1G049510	2.96259	NAD(P)H-quinone oxidoreductase subunit 2 A, chloroplastic
GO:0019693	ribose phosphate metabolic process	HORVU3Hr1G013350	2.02162	triosephosphate isomerase
GO:0019693	ribose phosphate metabolic process	HORVU5Hr1G064880	2.96259	NAD(P)H-quinone oxidoreductase subunit 2 A, chloroplastic
GO:0019693	ribose phosphate metabolic process	HORVU0Hr1G024810	2.43047	ATP synthase subunit a, chloroplastic
GO:0019693	ribose phosphate metabolic process	HORVU2Hr1G110680	7.59231	Molybdenum cofactor biosynthesis protein B
GO:0019693	ribose phosphate metabolic process	HORVU7Hr1G090850	2.46947	fructose-bisphosphate aldolase 2
GO:0019693	ribose phosphate metabolic process	HORVU0Hr1G028530	2.43047	ATP synthase subunit a, chloroplastic
GO:0019693	ribose phosphate metabolic process	HORVU6Hr1G049150	2.43047	ATP synthase subunit a, chloroplastic
GO:0019693	ribose phosphate metabolic process	HORVU5Hr1G065650	2.67125	ATP-dependent 6-phosphofructokinase 7
GO:0019693	ribose phosphate metabolic process	HORVU0Hr1G032740	2.43047	ATP synthase subunit a, chloroplastic
GO:0072521	purine-containing compound metabolic process	HORVU0Hr1G034720	2.96259	NAD(P)H-quinone oxidoreductase subunit 2 A, chloroplastic
GO:0072521	purine-containing compound metabolic process	HORVU7Hr1G076960	2.96259	NAD(P)H-quinone oxidoreductase subunit 2 A, chloroplastic
GO:0072521	purine-containing compound metabolic process	HORVU0Hr1G024480	2.43047	ATP synthase subunit a, chloroplastic
GO:0072521	purine-containing compound metabolic process	HORVU0Hr1G033900	2.43047	ATP synthase subunit a, chloroplastic
GO:0072521	purine-containing compound metabolic process	HORVU6Hr1G075280	2.62763	ATP synthase delta-subunit gene
GO:0072521	purine-containing compound metabolic process	HORVU0Hr1G036790	2.43047	ATP synthase subunit a, chloroplastic
GO:0072521	purine-containing compound metabolic process	HORVU6Hr1G049510	2.96259	NAD(P)H-quinone oxidoreductase subunit 2 A, chloroplastic
GO:0072521	purine-containing compound metabolic process	HORVU3Hr1G013350	2.02162	triosephosphate isomerase
GO:0072521	purine-containing compound metabolic process	HORVU5Hr1G064880	2.96259	NAD(P)H-quinone oxidoreductase subunit 2 A, chloroplastic
GO:0072521	purine-containing compound metabolic process	HORVU0Hr1G024810	2.43047	ATP synthase subunit a, chloroplastic
GO:0072521	purine-containing compound metabolic process	HORVU2Hr1G110680	7.59231	Molybdenum cofactor biosynthesis protein B
GO:0072521	purine-containing compound metabolic process	HORVU7Hr1G090850	2.46947	fructose-bisphosphate aldolase 2
GO:0072521	purine-containing compound metabolic process	HORVU0Hr1G028530	2.43047	ATP synthase subunit a, chloroplastic
GO:0072521	purine-containing compound metabolic process	HORVU6Hr1G049150	2.43047	ATP synthase subunit a, chloroplastic
GO:0072521	purine-containing compound metabolic process	HORVU5Hr1G065650	2.67125	ATP-dependent 6-phosphofructokinase 7
GO:0072521	purine-containing compound metabolic process	HORVU0Hr1G032740	2.43047	ATP synthase subunit a, chloroplastic
GO:0019637	organophosphate metabolic process	HORVU0Hr1G034720	2.96259	NAD(P)H-quinone oxidoreductase subunit 2 A, chloroplastic
GO:0019637	organophosphate metabolic process	HORVU7Hr1G076960	2.96259	NAD(P)H-quinone oxidoreductase subunit 2 A, chloroplastic
GO:0019637	organophosphate metabolic process	HORVU0Hr1G024480	2.43047	ATP synthase subunit a, chloroplastic
GO:0019637	organophosphate metabolic process	HORVU0Hr1G033900	2.43047	ATP synthase subunit a, chloroplastic
GO:0019637	organophosphate metabolic process	HORVU6Hr1G075280	2.62763	ATP synthase delta-subunit gene
GO:0019637	organophosphate metabolic process	HORVU0Hr1G036790	2.43047	ATP synthase subunit a, chloroplastic
GO:0019637	organophosphate metabolic process	HORVU6Hr1G049510	2.96259	NAD(P)H-quinone oxidoreductase subunit 2 A, chloroplastic
GO:0019637	organophosphate metabolic process	HORVU4Hr1G006200	2.37427	Phosphatidylinositol-4-phosphate 5-kinase family protein
GO:0019637	organophosphate metabolic process	HORVU3Hr1G013350	2.02162	triosephosphate isomerase
GO:0019637	organophosphate metabolic process	HORVU5Hr1G064880	2.96259	NAD(P)H-quinone oxidoreductase subunit 2 A, chloroplastic
GO:0019637	organophosphate metabolic process	HORVU0Hr1G024810	2.43047	ATP synthase subunit a, chloroplastic
GO:0019637	organophosphate metabolic process	HORVU4Hr1G077640	3.51146	alpha/beta-Hydrolases superfamily protein
GO:0019637	organophosphate metabolic process	HORVU2Hr1G005480	25.6153	adenylate kinase family protein
GO:0019637	organophosphate metabolic process	HORVU2Hr1G110680	7.59231	Molybdenum cofactor biosynthesis protein B
GO:0019637	organophosphate metabolic process	HORVU7Hr1G090850	2.46947	fructose-bisphosphate aldolase 2
GO:0019637	organophosphate metabolic process	HORVU0Hr1G028530	2.43047	ATP synthase subunit a, chloroplastic
GO:0019637	organophosphate metabolic process	HORVU6Hr1G049150	2.43047	ATP synthase subunit a, chloroplastic
GO:0019637	organophosphate metabolic process	HORVU5Hr1G065650	2.67125	ATP-dependent 6-phosphofructokinase 7
GO:0019637	organophosphate metabolic process	HORVU0Hr1G032740	2.43047	ATP synthase subunit a, chloroplastic
GO:0019637	organophosphate metabolic process	HORVU2Hr1G036380	3.90733	phosphatidylinositol-4-phosphate 5-kinase family protein
GO:0019637	organophosphate metabolic process	HORVU5Hr1G075330	4.00518	Type I inositol polyphosphate 5-phosphatase 12
GO:0009117	nucleotide metabolic process	HORVU0Hr1G034720	2.96259	NAD(P)H-quinone oxidoreductase subunit 2 A, chloroplastic
GO:0009117	nucleotide metabolic process	HORVU7Hr1G076960	2.96259	NAD(P)H-quinone oxidoreductase subunit 2 A, chloroplastic
GO:0009117	nucleotide metabolic process	HORVU0Hr1G024480	2.43047	ATP synthase subunit a, chloroplastic
GO:0009117	nucleotide metabolic process	HORVU0Hr1G033900	2.43047	ATP synthase subunit a, chloroplastic
GO:0009117	nucleotide metabolic process	HORVU6Hr1G075280	2.62763	ATP synthase delta-subunit gene
GO:0009117	nucleotide metabolic process	HORVU0Hr1G036790	2.43047	ATP synthase subunit a, chloroplastic
GO:0009117	nucleotide metabolic process	HORVU6Hr1G049510	2.96259	NAD(P)H-quinone oxidoreductase subunit 2 A, chloroplastic
GO:0009117	nucleotide metabolic process	HORVU3Hr1G013350	2.02162	triosephosphate isomerase
GO:0009117	nucleotide metabolic process	HORVU5Hr1G064880	2.96259	NAD(P)H-quinone oxidoreductase subunit 2 A, chloroplastic
GO:0009117	nucleotide metabolic process	HORVU0Hr1G024810	2.43047	ATP synthase subunit a, chloroplastic
GO:0009117	nucleotide metabolic process	HORVU2Hr1G005480	25.6153	adenylate kinase family protein
GO:0009117	nucleotide metabolic process	HORVU2Hr1G110680	7.59231	Molybdenum cofactor biosynthesis protein B
GO:0009117	nucleotide metabolic process	HORVU7Hr1G090850	2.46947	fructose-bisphosphate aldolase 2
GO:0009117	nucleotide metabolic process	HORVU0Hr1G028530	2.43047	ATP synthase subunit a, chloroplastic
GO:0009117	nucleotide metabolic process	HORVU6Hr1G049150	2.43047	ATP synthase subunit a, chloroplastic
GO:0009117	nucleotide metabolic process	HORVU5Hr1G065650	2.67125	ATP-dependent 6-phosphofructokinase 7
GO:0009117	nucleotide metabolic process	HORVU0Hr1G032740	2.43047	ATP synthase subunit a, chloroplastic
GO:0006753	nucleoside phosphate metabolic process	HORVU0Hr1G034720	2.96259	NAD(P)H-quinone oxidoreductase subunit 2 A, chloroplastic
GO:0006753	nucleoside phosphate metabolic process	HORVU7Hr1G076960	2.96259	NAD(P)H-quinone oxidoreductase subunit 2 A, chloroplastic
GO:0006753	nucleoside phosphate metabolic process	HORVU0Hr1G024480	2.43047	ATP synthase subunit a, chloroplastic
GO:0006753	nucleoside phosphate metabolic process	HORVU0Hr1G033900	2.43047	ATP synthase subunit a, chloroplastic
GO:0006753	nucleoside phosphate metabolic process	HORVU6Hr1G075280	2.62763	ATP synthase delta-subunit gene
GO:0006753	nucleoside phosphate metabolic process	HORVU0Hr1G036790	2.43047	ATP synthase subunit a, chloroplastic
GO:0006753	nucleoside phosphate metabolic process	HORVU6Hr1G049510	2.96259	NAD(P)H-quinone oxidoreductase subunit 2 A, chloroplastic
GO:0006753	nucleoside phosphate metabolic process	HORVU3Hr1G013350	2.02162	triosephosphate isomerase
GO:0006753	nucleoside phosphate metabolic process	HORVU5Hr1G064880	2.96259	NAD(P)H-quinone oxidoreductase subunit 2 A, chloroplastic
GO:0006753	nucleoside phosphate metabolic process	HORVU0Hr1G024810	2.43047	ATP synthase subunit a, chloroplastic
GO:0006753	nucleoside phosphate metabolic process	HORVU2Hr1G005480	25.6153	adenylate kinase family protein
GO:0006753	nucleoside phosphate metabolic process	HORVU2Hr1G110680	7.59231	Molybdenum cofactor biosynthesis protein B
GO:0006753	nucleoside phosphate metabolic process	HORVU7Hr1G090850	2.46947	fructose-bisphosphate aldolase 2
GO:0006753	nucleoside phosphate metabolic process	HORVU0Hr1G028530	2.43047	ATP synthase subunit a, chloroplastic
GO:0006753	nucleoside phosphate metabolic process	HORVU6Hr1G049150	2.43047	ATP synthase subunit a, chloroplastic
GO:0006753	nucleoside phosphate metabolic process	HORVU5Hr1G065650	2.67125	ATP-dependent 6-phosphofructokinase 7
GO:0006753	nucleoside phosphate metabolic process	HORVU0Hr1G032740	2.43047	ATP synthase subunit a, chloroplastic
GO:0015985	energy coupled proton transport, down electrochemical gradient	HORVU0Hr1G024810	2.43047	ATP synthase subunit a, chloroplastic
GO:0015985	energy coupled proton transport, down electrochemical gradient	HORVU0Hr1G024480	2.43047	ATP synthase subunit a, chloroplastic
GO:0015985	energy coupled proton transport, down electrochemical gradient	HORVU0Hr1G033900	2.43047	ATP synthase subunit a, chloroplastic
GO:0015985	energy coupled proton transport, down electrochemical gradient	HORVU6Hr1G075280	2.62763	ATP synthase delta-subunit gene
GO:0015985	energy coupled proton transport, down electrochemical gradient	HORVU0Hr1G036790	2.43047	ATP synthase subunit a, chloroplastic
GO:0015985	energy coupled proton transport, down electrochemical gradient	HORVU0Hr1G028530	2.43047	ATP synthase subunit a, chloroplastic
GO:0015985	energy coupled proton transport, down electrochemical gradient	HORVU6Hr1G049150	2.43047	ATP synthase subunit a, chloroplastic
GO:0015985	energy coupled proton transport, down electrochemical gradient	HORVU0Hr1G032740	2.43047	ATP synthase subunit a, chloroplastic
GO:0015986	ATP synthesis coupled proton transport	HORVU0Hr1G024810	2.43047	ATP synthase subunit a, chloroplastic
GO:0015986	ATP synthesis coupled proton transport	HORVU0Hr1G024480	2.43047	ATP synthase subunit a, chloroplastic
GO:0015986	ATP synthesis coupled proton transport	HORVU0Hr1G033900	2.43047	ATP synthase subunit a, chloroplastic
GO:0015986	ATP synthesis coupled proton transport	HORVU6Hr1G075280	2.62763	ATP synthase delta-subunit gene
GO:0015986	ATP synthesis coupled proton transport	HORVU0Hr1G036790	2.43047	ATP synthase subunit a, chloroplastic
GO:0015986	ATP synthesis coupled proton transport	HORVU0Hr1G028530	2.43047	ATP synthase subunit a, chloroplastic
GO:0015986	ATP synthesis coupled proton transport	HORVU6Hr1G049150	2.43047	ATP synthase subunit a, chloroplastic
GO:0015986	ATP synthesis coupled proton transport	HORVU0Hr1G032740	2.43047	ATP synthase subunit a, chloroplastic
GO:0055086	nucleobase-containing small molecule metabolic process	HORVU0Hr1G034720	2.96259	NAD(P)H-quinone oxidoreductase subunit 2 A, chloroplastic
GO:0055086	nucleobase-containing small molecule metabolic process	HORVU7Hr1G076960	2.96259	NAD(P)H-quinone oxidoreductase subunit 2 A, chloroplastic
GO:0055086	nucleobase-containing small molecule metabolic process	HORVU0Hr1G024480	2.43047	ATP synthase subunit a, chloroplastic
GO:0055086	nucleobase-containing small molecule metabolic process	HORVU0Hr1G033900	2.43047	ATP synthase subunit a, chloroplastic
GO:0055086	nucleobase-containing small molecule metabolic process	HORVU6Hr1G075280	2.62763	ATP synthase delta-subunit gene
GO:0055086	nucleobase-containing small molecule metabolic process	HORVU0Hr1G036790	2.43047	ATP synthase subunit a, chloroplastic
GO:0055086	nucleobase-containing small molecule metabolic process	HORVU6Hr1G049510	2.96259	NAD(P)H-quinone oxidoreductase subunit 2 A, chloroplastic
GO:0055086	nucleobase-containing small molecule metabolic process	HORVU3Hr1G013350	2.02162	triosephosphate isomerase
GO:0055086	nucleobase-containing small molecule metabolic process	HORVU5Hr1G064880	2.96259	NAD(P)H-quinone oxidoreductase subunit 2 A, chloroplastic
GO:0055086	nucleobase-containing small molecule metabolic process	HORVU0Hr1G024810	2.43047	ATP synthase subunit a, chloroplastic
GO:0055086	nucleobase-containing small molecule metabolic process	HORVU2Hr1G005480	25.6153	adenylate kinase family protein
GO:0055086	nucleobase-containing small molecule metabolic process	HORVU2Hr1G110680	7.59231	Molybdenum cofactor biosynthesis protein B
GO:0055086	nucleobase-containing small molecule metabolic process	HORVU7Hr1G090850	2.46947	fructose-bisphosphate aldolase 2
GO:0055086	nucleobase-containing small molecule metabolic process	HORVU0Hr1G028530	2.43047	ATP synthase subunit a, chloroplastic
GO:0055086	nucleobase-containing small molecule metabolic process	HORVU6Hr1G049150	2.43047	ATP synthase subunit a, chloroplastic
GO:0055086	nucleobase-containing small molecule metabolic process	HORVU5Hr1G065650	2.67125	ATP-dependent 6-phosphofructokinase 7
GO:0055086	nucleobase-containing small molecule metabolic process	HORVU0Hr1G032740	2.43047	ATP synthase subunit a, chloroplastic
